# Supplementary material for: Antidepressant use and risk of cardiovascular outcomes in people aged 20 to 64: cohort study using primary care database
Source: PubMed Central journal article supplement (PMC4804126; doi:10.1136/bmj.i1350), 2016-03-22
Supplement: couc027737.ww1_default.pdf [file couc027737.ww1_default.pdf]

| <b>Outcome</b> | <b>Code type</b> | <b>Code</b> | <b>Code Description</b>                     |
|----------------|------------------|-------------|---------------------------------------------|
| Arrhythmia     | Read code        | 327Z        | ECG: supraventric. arryth. NOS              |
| Arrhythmia     | Read code        | 328Z        | ECG: ventricular arrhythmia NOS             |
| Arrhythmia     | Read code        | EMISNQAS1   | Asystolic vasovagal syncope                 |
| Arrhythmia     | Read code        | F2560       | Hypsarrhythmia                              |
| Arrhythmia     | Read code        | G57-1       | Cardiac arrhythmias                         |
| Arrhythmia     | Read code        | G570        | Paroxysmal supraventricular tachycardia     |
| Arrhythmia     | Read code        | G570-99     | Parox. supravent. tachycardia               |
| Arrhythmia     | Read code        | G5700       | Paroxysmal atrial tachycardia               |
| Arrhythmia     | Read code        | G5701       | Paroxysmal atrioventricular tachycardia     |
| Arrhythmia     | Read code        | G5702       | Paroxysmal junctional tachycardia           |
| Arrhythmia     | Read code        | G5703       | Paroxysmal nodal tachycardia                |
| Arrhythmia     | Read code        | G570z       | Paroxysmal supraventricular tachycardia NOS |
| Arrhythmia     | Read code        | G571        | Paroxysmal ventricular tachycardia          |
| Arrhythmia     | Read code        | G571-1      | Ventricular tachycardia                     |
| Arrhythmia     | Read code        | G571-99     | Paroxysmal ventric. tachyc.                 |
| Arrhythmia     | Read code        | G572        | Paroxysmal tachycardia unspecified          |
| Arrhythmia     | Read code        | G5720       | Essential paroxysmal tachycardia            |
| Arrhythmia     | Read code        | G5721       | Bouveret-Hoffmann syndrome                  |
| Arrhythmia     | Read code        | G572z       | Paroxysmal tachycardia NOS                  |
| Arrhythmia     | Read code        | G573        | Atrial fibrillation and flutter             |
| Arrhythmia     | Read code        | G5730       | Atrial fibrillation                         |
| Arrhythmia     | Read code        | G5731       | Atrial flutter                              |
| Arrhythmia     | Read code        | G5732       | Paroxysmal atrial fibrillation              |
| Arrhythmia     | Read code        | G5733       | Non-rheumatic atrial fibrillation           |
| Arrhythmia     | Read code        | G573z       | Atrial fibrillation and flutter NOS         |
| Arrhythmia     | Read code        | G574        | Ventricular fibrillation and flutter        |
| Arrhythmia     | Read code        | G5740       | Ventricular fibrillation                    |
| Arrhythmia     | Read code        | G5740-1     | Cardiac arrest-ventricular fibrillation     |
| Arrhythmia     | Read code        | G5741       | Ventricular flutter                         |
| Arrhythmia     | Read code        | G574z       | Ventricular fibrillation and flutter NOS    |
| Arrhythmia     | Read code        | G576-1      | Premature beats                             |
| Arrhythmia     | Read code        | G5760       | Ectopic beats unspecified                   |

| <b>Outcome</b> | <b>Code type</b> | <b>Code</b> | <b>Code Description</b>                 |
|----------------|------------------|-------------|-----------------------------------------|
| Arrhythmia     | Read code        | G5760-1     | Extrasystoles                           |
| Arrhythmia     | Read code        | G5761       | Supraventricular ectopic beats          |
| Arrhythmia     | Read code        | G5762       | Ventricular ectopic beats               |
| Arrhythmia     | Read code        | G5763       | Atrial premature depolarization         |
| Arrhythmia     | Read code        | G5764       | Junctional premature depolarization     |
| Arrhythmia     | Read code        | G5765       | Ventricular premature depolarization    |
| Arrhythmia     | Read code        | G576z       | Ectopic beats NOS                       |
| Arrhythmia     | Read code        | G577        | Sinus arrhythmia                        |
| Arrhythmia     | Read code        | G57y        | Other cardiac dysrhythmias              |
| Arrhythmia     | Read code        | G57y-99     | Cardiac dysrhythmias NOS                |
| Arrhythmia     | Read code        | G57y0       | Persistent sinus bradycardia            |
| Arrhythmia     | Read code        | G57y1       | Severe sinus bradycardia                |
| Arrhythmia     | Read code        | G57y3       | Sick sinus syndrome                     |
| Arrhythmia     | Read code        | G57y4       | Sinoatrial node dysfunction NOS         |
| Arrhythmia     | Read code        | G57y5       | Wandering atrial pacemaker              |
| Arrhythmia     | Read code        | G57y6       | Nodal rhythm disorder                   |
| Arrhythmia     | Read code        | G57y7       | Sinus tachycardia                       |
| Arrhythmia     | Read code        | G57y8       | Bigeminal pulse                         |
| Arrhythmia     | Read code        | G57y9       | Supraventricular tachycardia NOS        |
| Arrhythmia     | Read code        | G57yA       | Re-entry ventricular arrhythmia         |
| Arrhythmia     | Read code        | G57yz       | Other cardiac dysrhythmia NOS           |
| Arrhythmia     | Read code        | G57z        | Cardiac dysrhythmia NOS                 |
| Arrhythmia     | Read code        | G57z-99     | Cardiac dysrhythmias NOS                |
| Arrhythmia     | Read code        | Gyu5a       | [X]Other specified cardiac arrhythmias  |
| Arrhythmia     | ICD9             | 427         | Cardiac dysrhythmias                    |
| Arrhythmia     | ICD9             | 427         | Paroxysmal supraventricular tachycardia |
| Arrhythmia     | ICD9             | 427.1       | Paroxysmal ventricular tachycardia      |
| Arrhythmia     | ICD9             | 427.2       | Paroxysmal tachycardia, unspecified     |
| Arrhythmia     | ICD9             | 427.3       | Atrial fibrillation and flutter         |
| Arrhythmia     | ICD9             | 427.31      | Atrial fibrillation                     |
| Arrhythmia     | ICD9             | 427.32      | Atrial flutter                          |

| <b>Outcome</b>        | <b>Code type</b> | <b>Code</b> | <b>Code Description</b>                        |
|-----------------------|------------------|-------------|------------------------------------------------|
| Arrhythmia            | ICD9             | 427.4       | Ventricular fibrillation and flutter           |
| Arrhythmia            | ICD9             | 427.41      | Ventricular fibrillation                       |
| Arrhythmia            | ICD9             | 427.42      | Ventricular flutter                            |
| Arrhythmia            | ICD9             | 427.6       | Premature beats                                |
| Arrhythmia            | ICD9             | 427.6       | Premature beats, unspecified                   |
| Arrhythmia            | ICD9             | 427.61      | Supraventricular premature beats               |
| Arrhythmia            | ICD9             | 427.69      | Other                                          |
| Arrhythmia            | ICD9             | 427.8       | Other specified cardiac dysrhythmias           |
| Arrhythmia            | ICD9             | 427.81      | Sinoatrial node dysfunction                    |
| Arrhythmia            | ICD9             | 427.89      | Other                                          |
| Arrhythmia            | ICD9             | 427.9       | Cardiac dysrhythmia, unspecified               |
| Arrhythmia            | ICD10            | I47         | Paroxysmal tachycardia                         |
| Arrhythmia            | ICD10            | I47.0       | Re-entry ventricular arrhythmia                |
| Arrhythmia            | ICD10            | I47.1       | Supraventricular tachycardia                   |
| Arrhythmia            | ICD10            | I47.2       | Ventricular tachycardia                        |
| Arrhythmia            | ICD10            | I47.9       | Paroxysmal tachycardia, unspecified            |
| Arrhythmia            | ICD10            | I48         | Atrial fibrillation and flutter                |
| Arrhythmia            | ICD10            | I49         | Other cardiac arrhythmias                      |
| Arrhythmia            | ICD10            | I49.0       | Ventricular fibrillation and flutter           |
| Arrhythmia            | ICD10            | I49.1       | Atrial premature depolarization                |
| Arrhythmia            | ICD10            | I49.2       | Junctional premature depolarization            |
| Arrhythmia            | ICD10            | I49.3       | Ventricular premature depolarization           |
| Arrhythmia            | ICD10            | I49.4       | Other and unspecified premature depolarization |
| Arrhythmia            | ICD10            | I49.5       | Sick sinus syndrome                            |
| Arrhythmia            | ICD10            | I49.8       | Other specified cardiac arrhythmias            |
| Arrhythmia            | ICD10            | I49.9       | Cardiac arrhythmia, unspecified                |
| Myocardial infarction | Read code        | EMISR4QF11  | First myocardial infarction                    |
| Myocardial infarction | Read code        | G30         | Acute myocardial infarction                    |
| Myocardial infarction | Read code        | G30-1       | Attack - heart                                 |
| Myocardial infarction | Read code        | G30-2       | Coronary thrombosis                            |

| <b>Outcome</b>        | <b>Code type</b> | <b>Code</b> | <b>Code Description</b>                                 |
|-----------------------|------------------|-------------|---------------------------------------------------------|
| Myocardial infarction | Read code        | G30-3       | Cardiac rupture following myocardial infarction (MI)    |
| Myocardial infarction | Read code        | G30-4       | Heart attack                                            |
| Myocardial infarction | Read code        | G30-5       | MI - acute myocardial infarction                        |
| Myocardial infarction | Read code        | G30-6       | Thrombosis - coronary                                   |
| Myocardial infarction | Read code        | G30-7       | Silent myocardial infarction                            |
| Myocardial infarction | Read code        | G30-98      | Coronary thrombosis                                     |
| Myocardial infarction | Read code        | G30-99      | Myocardial Infarction                                   |
| Myocardial infarction | Read code        | G300        | Acute anterolateral infarction                          |
| Myocardial infarction | Read code        | G301        | Other specified anterior myocardial infarction          |
| Myocardial infarction | Read code        | G3010       | Acute anteroapical infarction                           |
| Myocardial infarction | Read code        | G3011       | Acute anteroseptal infarction                           |
| Myocardial infarction | Read code        | G301z       | Anterior myocardial infarction NOS                      |
| Myocardial infarction | Read code        | G302        | Acute inferolateral infarction                          |
| Myocardial infarction | Read code        | G303        | Acute inferoposterior infarction                        |
| Myocardial infarction | Read code        | G304        | Posterior myocardial infarction NOS                     |
| Myocardial infarction | Read code        | G305        | Lateral myocardial infarction NOS                       |
| Myocardial infarction | Read code        | G306        | True posterior myocardial infarction                    |
| Myocardial infarction | Read code        | G307        | Acute subendocardial infarction                         |
| Myocardial infarction | Read code        | G3070       | Acute non-Q wave infarction                             |
| Myocardial infarction | Read code        | G3071       | Acute non-ST segment elevation myocardial infarction    |
| Myocardial infarction | Read code        | G308        | Inferior myocardial infarction NOS                      |
| Myocardial infarction | Read code        | G309        | Acute Q-wave infarct                                    |
| Myocardial infarction | Read code        | G30A        | Mural thrombosis                                        |
| Myocardial infarction | Read code        | G30B        | Acute posterolateral myocardial infarction              |
| Myocardial infarction | Read code        | G30X        | Acute transmural myocardial infarction of unspecif site |
| Myocardial infarction | Read code        | G30X0       | Acute ST segment elevation myocardial infarction        |
| Myocardial infarction | Read code        | G30y        | Other acute myocardial infarction                       |
| Myocardial infarction | Read code        | G30y0       | Acute atrial infarction                                 |
| Myocardial infarction | Read code        | G30y1       | Acute papillary muscle infarction                       |
| Myocardial infarction | Read code        | G30y2       | Acute septal infarction                                 |
| Myocardial infarction | Read code        | G30yz       | Other acute myocardial infarction NOS                   |
| Myocardial infarction | Read code        | G30z        | Acute myocardial infarction NOS                         |

| <b>Outcome</b>        | <b>Code type</b> | <b>Code</b> | <b>Code Description</b>                                      |
|-----------------------|------------------|-------------|--------------------------------------------------------------|
| Myocardial infarction | Read code        | G310-1      | Dressler's syndrome                                          |
| Myocardial infarction | Read code        | G31y1       | Microinfarction of heart                                     |
| Myocardial infarction | Read code        | G35         | Subsequent myocardial infarction                             |
| Myocardial infarction | Read code        | G350        | Subsequent myocardial infarction of anterior wall            |
| Myocardial infarction | Read code        | G351        | Subsequent myocardial infarction of inferior wall            |
| Myocardial infarction | Read code        | G353        | Subsequent myocardial infarction of other sites              |
| Myocardial infarction | Read code        | G35X        | Subsequent myocardial infarction of unspecified site         |
| Myocardial infarction | Read code        | G360        | Haemopericardium/current comp folow acut myocard infarct     |
| Myocardial infarction | Read code        | G361        | Atrial septal defect/curr comp folow acut myocardal infarct  |
| Myocardial infarction | Read code        | G362        | Ventric septal defect/curr comp fol acut myocardal infarctn  |
| Myocardial infarction | Read code        | G363        | Ruptur cardiac wall w'out haemopericard/cur comp fol ac MI   |
| Myocardial infarction | Read code        | G364        | Ruptur chordae tendinae/curr comp fol acute myocard infarct  |
| Myocardial infarction | Read code        | G365        | Rupture papillary muscle/curr comp fol acute myocard infarct |
| Myocardial infarction | Read code        | G366        | Thrombosis atrium,auric append&vent/curr comp foll acute MI  |
| Myocardial infarction | Read code        | G38         | Postoperative myocardial infarction                          |
| Myocardial infarction | Read code        | G380        | Postoperative transmural myocardial infarction anterior wall |
| Myocardial infarction | Read code        | G381        | Postoperative transmural myocardial infarction inferior wall |
| Myocardial infarction | Read code        | G382        | Postoperative transmural myocardial infarction other sites   |
| Myocardial infarction | Read code        | G383        | Postoperative transmural myocardial infarction unspec site   |
| Myocardial infarction | Read code        | G384        | Postoperative subendocardial myocardial infarction           |
| Myocardial infarction | Read code        | G38z        | Postoperative myocardial infarction, unspecified             |
| Myocardial infarction | Read code        | G501        | Post infarction pericarditis                                 |
| Myocardial infarction | Read code        | Gyu34       | [X]Acute transmural myocardial infarction of unspecif site   |
| Myocardial infarction | ICD9             | 410         | Acute myocardial infarction                                  |
| Myocardial infarction | ICD9             | 410         | Of anterolateral wall                                        |
| Myocardial infarction | ICD9             | 410.1       | Of other anterior wall                                       |
| Myocardial infarction | ICD9             | 410.2       | Of inferolateral wall                                        |
| Myocardial infarction | ICD9             | 410.3       | Of inferoposterior wall                                      |
| Myocardial infarction | ICD9             | 410.4       | Of other inferior wall                                       |
| Myocardial infarction | ICD9             | 410.5       | Of other lateral wall                                        |
| Myocardial infarction | ICD9             | 410.6       | True posterior wall infarction                               |

| <b>Outcome</b>        | <b>Code type</b> | <b>Code</b> | <b>Code Description</b>                                      |
|-----------------------|------------------|-------------|--------------------------------------------------------------|
| Myocardial infarction | ICD9             | 410.7       | Subendocardial infarction                                    |
| Myocardial infarction | ICD9             | 410.8       | Of other specified sites                                     |
| Myocardial infarction | ICD9             | 410.9       | Unspecified site                                             |
| Myocardial infarction | ICD10            | I21         | Acute myocardial infarction                                  |
| Myocardial infarction | ICD10            | I21.0       | Acute transmural myocardial infarction of anterior wall      |
| Myocardial infarction | ICD10            | I21.1       | Acute transmural myocardial infarction of inferior wall      |
| Myocardial infarction | ICD10            | I21.2       | Acute transmural myocardial infarction of other sites        |
| Myocardial infarction | ICD10            | I21.3       | Acute transmural myocardial infarction of unspecified site   |
| Myocardial infarction | ICD10            | I21.4       | Acute subendocardial myocardial infarction                   |
| Myocardial infarction | ICD10            | I21.9       | Acute myocardial infarction, unspecified                     |
| Myocardial infarction | ICD10            | I22         | Subsequent myocardial infarction                             |
| Myocardial infarction | ICD10            | I22.0       | Subsequent myocardial infarction of anterior wall            |
| Myocardial infarction | ICD10            | I22.1       | Subsequent myocardial infarction of inferior wall            |
| Myocardial infarction | ICD10            | I22.8       | Subsequent myocardial infarction of other sites              |
| Myocardial infarction | ICD10            | I22.9       | Subsequent myocardial infarction of unspecified site         |
| Stroke or TIA         | Read code        | F4236       | Amaurosis fugax                                              |
| Stroke or TIA         | Read code        | Fyu55       | [X]Other transnt cerebral ischaemic attacks+related syndroms |
| Stroke or TIA         | Read code        | G61         | Intracerebral haemorrhage                                    |
| Stroke or TIA         | Read code        | G61-1       | CVA - cerebrovascular accid due to intracerebral haemorrhage |
| Stroke or TIA         | Read code        | G61-2       | Stroke due to intracerebral haemorrhage                      |
| Stroke or TIA         | Read code        | G61-98      | Cerebral haemorrhage NOS                                     |
| Stroke or TIA         | Read code        | G61-99      | Cerebral haemorrhage                                         |
| Stroke or TIA         | Read code        | G610        | Cortical haemorrhage                                         |
| Stroke or TIA         | Read code        | G611        | Internal capsule haemorrhage                                 |
| Stroke or TIA         | Read code        | G612        | Basal nucleus haemorrhage                                    |
| Stroke or TIA         | Read code        | G613        | Cerebellar haemorrhage                                       |
| Stroke or TIA         | Read code        | G614        | Pontine haemorrhage                                          |
| Stroke or TIA         | Read code        | G615        | Bulbar haemorrhage                                           |
| Stroke or TIA         | Read code        | G616        | External capsule haemorrhage                                 |
| Stroke or TIA         | Read code        | G618        | Intracerebral haemorrhage, multiple localized                |

| <b>Outcome</b> | <b>Code type</b> | <b>Code</b> | <b>Code Description</b>                                     |
|----------------|------------------|-------------|-------------------------------------------------------------|
| Stroke or TIA  | Read code        | G61X        | Intracerebral haemorrhage in hemisphere, unspecified        |
| Stroke or TIA  | Read code        | G61X0       | Left sided intracerebral haemorrhage, unspecified           |
| Stroke or TIA  | Read code        | G61X1       | Right sided intracerebral haemorrhage, unspecified          |
| Stroke or TIA  | Read code        | G61z        | Intracerebral haemorrhage NOS                               |
| Stroke or TIA  | Read code        | G63y0       | Cerebral infarct due to thrombosis of precerebral arteries  |
| Stroke or TIA  | Read code        | G63y1       | Cerebral infarction due to embolism of precerebral arteries |
| Stroke or TIA  | Read code        | G64         | Cerebral arterial occlusion                                 |
| Stroke or TIA  | Read code        | G64-1       | CVA - cerebral artery occlusion                             |
| Stroke or TIA  | Read code        | G64-2       | Infarction - cerebral                                       |
| Stroke or TIA  | Read code        | G64-3       | Stroke due to cerebral arterial occlusion                   |
| Stroke or TIA  | Read code        | G640        | Cerebral thrombosis                                         |
| Stroke or TIA  | Read code        | G6400       | Cerebral infarction due to thrombosis of cerebral arteries  |
| Stroke or TIA  | Read code        | G641        | Cerebral embolism                                           |
| Stroke or TIA  | Read code        | G641-1      | Cerebral embolus                                            |
| Stroke or TIA  | Read code        | G6410       | Cerebral infarction due to embolism of cerebral arteries    |
| Stroke or TIA  | Read code        | G64z        | Cerebral infarction NOS                                     |
| Stroke or TIA  | Read code        | G64z-1      | Brainstem infarction NOS                                    |
| Stroke or TIA  | Read code        | G64z-2      | Cerebellar infarction                                       |
| Stroke or TIA  | Read code        | G64z-99     | Cerebral A. occlusion NOS                                   |
| Stroke or TIA  | Read code        | G64z0       | Brainstem infarction                                        |
| Stroke or TIA  | Read code        | G64z1       | Wallenberg syndrome                                         |
| Stroke or TIA  | Read code        | G64z1-1     | Lateral medullary syndrome                                  |
| Stroke or TIA  | Read code        | G64z2       | Left sided cerebral infarction                              |
| Stroke or TIA  | Read code        | G64z3       | Right sided cerebral infarction                             |
| Stroke or TIA  | Read code        | G64z4       | Infarction of basal ganglia                                 |
| Stroke or TIA  | Read code        | G65         | Transient cerebral ischaemia                                |
| Stroke or TIA  | Read code        | G65-1       | Drop attack                                                 |
| Stroke or TIA  | Read code        | G65-2       | Transient ischaemic attack                                  |
| Stroke or TIA  | Read code        | G65-3       | Vertebro-basilar insufficiency                              |
| Stroke or TIA  | Read code        | G65-99      | Transient Ischaemic Attacks                                 |
| Stroke or TIA  | Read code        | G650        | Basilar artery syndrome                                     |
| Stroke or TIA  | Read code        | G650-1      | Insufficiency - basilar artery                              |

| <b>Outcome</b> | <b>Code type</b> | <b>Code</b> | <b>Code Description</b>                                     |
|----------------|------------------|-------------|-------------------------------------------------------------|
| Stroke or TIA  | Read code        | G651        | Vertebral artery syndrome                                   |
| Stroke or TIA  | Read code        | G6510       | Vertebro-basilar artery syndrome                            |
| Stroke or TIA  | Read code        | G652        | Subclavian steal syndrome                                   |
| Stroke or TIA  | Read code        | G653        | Carotid artery syndrome hemispheric                         |
| Stroke or TIA  | Read code        | G654        | Multiple and bilateral precerebral artery syndromes         |
| Stroke or TIA  | Read code        | G656        | Vertebrobasilar insufficiency                               |
| Stroke or TIA  | Read code        | G65y        | Other transient cerebral ischaemia                          |
| Stroke or TIA  | Read code        | G65z        | Transient cerebral ischaemia NOS                            |
| Stroke or TIA  | Read code        | G65z-99     | Transient Ischaemic Attacks                                 |
| Stroke or TIA  | Read code        | G65z0       | Impending cerebral ischaemia                                |
| Stroke or TIA  | Read code        | G65z1       | Intermittent cerebral ischaemia                             |
| Stroke or TIA  | Read code        | G65zz       | Transient cerebral ischaemia NOS                            |
| Stroke or TIA  | Read code        | G66         | Stroke and cerebrovascular accident unspecified             |
| Stroke or TIA  | Read code        | G66-1       | CVA unspecified                                             |
| Stroke or TIA  | Read code        | G66-2       | Stroke unspecified                                          |
| Stroke or TIA  | Read code        | G66-3       | CVA - Cerebrovascular accident unspecified                  |
| Stroke or TIA  | Read code        | G66-98      | Stroke/CVA - undefined                                      |
| Stroke or TIA  | Read code        | G66-99      | Stroke                                                      |
| Stroke or TIA  | Read code        | G660        | Middle cerebral artery syndrome                             |
| Stroke or TIA  | Read code        | G661        | Anterior cerebral artery syndrome                           |
| Stroke or TIA  | Read code        | G662        | Posterior cerebral artery syndrome                          |
| Stroke or TIA  | Read code        | G663        | Brain stem stroke syndrome                                  |
| Stroke or TIA  | Read code        | G664        | Cerebellar stroke syndrome                                  |
| Stroke or TIA  | Read code        | G665        | Pure motor lacunar syndrome                                 |
| Stroke or TIA  | Read code        | G666        | Pure sensory lacunar syndrome                               |
| Stroke or TIA  | Read code        | G667        | Left sided CVA                                              |
| Stroke or TIA  | Read code        | G668        | Right sided CVA                                             |
| Stroke or TIA  | Read code        | G6760       | Cereb infarct due cerebral venous thrombosis, nonpyogenic   |
| Stroke or TIA  | Read code        | G6W         | Cereb infarct due unsp occlus/stenos precerebr arteries     |
| Stroke or TIA  | Read code        | G6X         | Cerebrl infarctn due/unspcf occlusn or sten/cerebrl artr    |
| Stroke or TIA  | Read code        | Gyu62       | [X]Other intracerebral haemorrhage                          |
| Stroke or TIA  | Read code        | Gyu63       | [X]Cerebrl infarctn due/unspcf occlusn or sten/cerebrl artr |



| <b>Outcome</b> | <b>Code type</b> | <b>Code</b> | <b>Code Description</b>                                                                           |
|----------------|------------------|-------------|---------------------------------------------------------------------------------------------------|
| Stroke or TIA  | Read code        | Gyu64       | [X]Other cerebral infarction                                                                      |
| Stroke or TIA  | Read code        | Gyu65       | [X]Occlusion and stenosis of other precerebral arteries                                           |
| Stroke or TIA  | Read code        | Gyu66       | [X]Occlusion and stenosis of other cerebral arteries                                              |
| Stroke or TIA  | Read code        | Gyu6F       | [X]Intracerebral haemorrhage in hemisphere, unspecified                                           |
| Stroke or TIA  | Read code        | Gyu6G       | [X]Cerebr infarct due unsp occlus/stenos precerebr arteries                                       |
| Stroke or TIA  | Read code        | ZV12D       | [V]Personal history of transient ischaemic attack                                                 |
| Stroke or TIA  | ICD9             | 430         | Subarachnoid hemorrhage                                                                           |
| Stroke or TIA  | ICD9             | 431         | Intracerebral hemorrhage                                                                          |
| Stroke or TIA  | ICD9             | 432         | Other and unspecified intracranial hemorrhage                                                     |
| Stroke or TIA  | ICD9             | 432         | Nontraumatic extradural hemorrhage                                                                |
| Stroke or TIA  | ICD9             | 432.1       | Subdural hemorrhage                                                                               |
| Stroke or TIA  | ICD9             | 432.9       | Hemorrhage, intracranial, NOS                                                                     |
| Stroke or TIA  | ICD9             | 433         | Occlusion and stenosis of precerebral arteries                                                    |
| Stroke or TIA  | ICD9             | 433         | Occlusion and stenosis of basilar artery                                                          |
| Stroke or TIA  | ICD9             | 433         | Occlusion and stenosis of basilar artery without cerebral infarction                              |
| Stroke or TIA  | ICD9             | 433.01      | Occlusion and stenosis of basilar artery with cerebral infarction                                 |
| Stroke or TIA  | ICD9             | 433.1       | Occlusion and stenosis of carotid artery                                                          |
| Stroke or TIA  | ICD9             | 433.1       | Occlusion and stenosis of carotid artery without cerebral infarction                              |
| Stroke or TIA  | ICD9             | 433.11      | Occlusion and stenosis of carotid artery with cerebral infarction                                 |
| Stroke or TIA  | ICD9             | 433.2       | Occlusion and stenosis of vertebral artery                                                        |
| Stroke or TIA  | ICD9             | 433.2       | Occlusion and stenosis of vertebral artery without cerebral infarction                            |
| Stroke or TIA  | ICD9             | 433.21      | Occlusion and stenosis of vertebral artery with cerebral infarction                               |
| Stroke or TIA  | ICD9             | 433.3       | Occlusion and stenosis of multiple and bilateral precerebral arteries                             |
| Stroke or TIA  | ICD9             | 433.3       | Occlusion and stenosis of multiple and bilateral precerebral arteries without cerebral infarction |
| Stroke or TIA  | ICD9             | 433.8       | Occlusion and stenosis of other specified precerebral artery                                      |
| Stroke or TIA  | ICD9             | 433.8       | Occlusion and stenosis of other specified precerebral artery without cerebral infarction          |
| Stroke or TIA  | ICD9             | 433.81      | Occlusion and stenosis of other specified precerebral artery with cerebral infarction             |
| Stroke or TIA  | ICD9             | 433.9       | Occlusion and stenosis of unspecified precerebral artery                                          |
| Stroke or TIA  | ICD9             | 433.9       | Occlusion and stenosis of unspecified precerebral artery without cerebral infarction              |
| Stroke or TIA  | ICD9             | 433.91      | Occlusion and stenosis of unspecified precerebral artery with cerebral infarction                 |
| Stroke or TIA  | ICD9             | 434         | Occlusion of cerebral arteries                                                                    |

| <b>Outcome</b> | <b>Code type</b> | <b>Code</b> | <b>Code Description</b>                                              |
|----------------|------------------|-------------|----------------------------------------------------------------------|
| Stroke or TIA  | ICD9             | 434         | Cerebral thrombosis                                                  |
| Stroke or TIA  | ICD9             | 434         | Cerebral thrombosis without cerebral infarction                      |
| Stroke or TIA  | ICD9             | 434.01      | Cerebral thrombosis with cerebral infarction                         |
| Stroke or TIA  | ICD9             | 434.1       | Cerebral embolism                                                    |
| Stroke or TIA  | ICD9             | 434.1       | Cerebral embolism without cerebral infarction                        |
| Stroke or TIA  | ICD9             | 434.11      | Cerebral embolism with cerebral infarction                           |
| Stroke or TIA  | ICD9             | 434.9       | Cerebral artery occlusion unspecified                                |
| Stroke or TIA  | ICD9             | 434.9       | Cerebral artery occlusion unspecified without cerebral infarction    |
| Stroke or TIA  | ICD9             | 434.91      | Cerebral artery occlusion unspecified with cerebral infarction       |
| Stroke or TIA  | ICD9             | 435         | Transient cerebral ischemia                                          |
| Stroke or TIA  | ICD9             | 435         | Basilar artery syndrome                                              |
| Stroke or TIA  | ICD9             | 435.1       | Vertebral artery syndrome                                            |
| Stroke or TIA  | ICD9             | 435.2       | Subclavian steal syndrome                                            |
| Stroke or TIA  | ICD9             | 435.3       | Vertebrobasilar artery syndrome                                      |
| Stroke or TIA  | ICD9             | 435.9       | Transient ischemic attack, unspec.                                   |
| Stroke or TIA  | ICD9             | 436         | Acute but ill-defined cerebrovascular disease                        |
| Stroke or TIA  | ICD9             | 437         | Other and ill-defined cerebrovascular disease                        |
| Stroke or TIA  | ICD9             | 437         | Cerebral atherosclerosis                                             |
| Stroke or TIA  | ICD9             | 437.1       | Other generalized ischemic cerebrovascular disease                   |
| Stroke or TIA  | ICD9             | 437.3       | Cerebral aneurysm nonruptured                                        |
| Stroke or TIA  | ICD9             | 437.4       | Cerebral arteritis                                                   |
| Stroke or TIA  | ICD9             | 437.5       | Moyamoya disease                                                     |
| Stroke or TIA  | ICD9             | 437.6       | Nonpyogenic thrombosis of intracranial venous sinus                  |
| Stroke or TIA  | ICD9             | 437.7       | Transient global amnesia                                             |
| Stroke or TIA  | ICD9             | 437.8       | Other ill-defined cerebrovascular disease                            |
| Stroke or TIA  | ICD9             | 437.9       | Unspecified cerebrovascular disease                                  |
| Stroke or TIA  | ICD10            | G46*        | Vascular syndromes of brain in cerebrovascular diseases ( I60-I67+ ) |
| Stroke or TIA  | ICD10            | G46.0*      | Middle cerebral artery syndrome (I66.0+)                             |
| Stroke or TIA  | ICD10            | G46.1*      | Anterior cerebral artery syndrome (I66.1+)                           |
| Stroke or TIA  | ICD10            | G46.2*      | Posterior cerebral artery syndrome (I66.2+)                          |
| Stroke or TIA  | ICD10            | G46.3*      | Brain stem stroke syndrome (I60 - I67+)                              |

| <b>Outcome</b> | <b>Code type</b> | <b>Code</b> | <b>Code Description</b>                                                    |
|----------------|------------------|-------------|----------------------------------------------------------------------------|
| Stroke or TIA  | ICD10            | G46.4*      | Cerebellar stroke syndrome (I60 - I67+)                                    |
| Stroke or TIA  | ICD10            | G46.5*      | Pure motor lacunar syndrome (I60 - I67+)                                   |
| Stroke or TIA  | ICD10            | G46.6*      | Pure sensory lacunar syndrome (I60 - I67+)                                 |
| Stroke or TIA  | ICD10            | G46.7*      | Other lacunar syndromes (I60 - I67+)                                       |
| Stroke or TIA  | ICD10            | G46.8*      | Other vascular syndromes of brain in cerebrovascular diseases (I60 - I67+) |
| Stroke or TIA  | ICD10            | I60         | Subarachnoid haemorrhage                                                   |
| Stroke or TIA  | ICD10            | I60.0       | Subarachnoid haemorrhage from carotid siphon and bifurcation               |
| Stroke or TIA  | ICD10            | I60.1       | Subarachnoid haemorrhage from middle cerebral artery                       |
| Stroke or TIA  | ICD10            | I60.2       | Subarachnoid haemorrhage from anterior communicating artery                |
| Stroke or TIA  | ICD10            | I60.3       | Subarachnoid haemorrhage from posterior communicating artery               |
| Stroke or TIA  | ICD10            | I60.4       | Subarachnoid haemorrhage from basilar artery                               |
| Stroke or TIA  | ICD10            | I60.5       | Subarachnoid haemorrhage from vertebral artery                             |
| Stroke or TIA  | ICD10            | I60.6       | Subarachnoid haemorrhage from other intracranial arteries                  |
| Stroke or TIA  | ICD10            | I60.7       | Subarachnoid haemorrhage from intracranial artery, unspecified             |
| Stroke or TIA  | ICD10            | I60.8       | Other subarachnoid haemorrhage                                             |
| Stroke or TIA  | ICD10            | I60.9       | Subarachnoid haemorrhage, unspecified                                      |
| Stroke or TIA  | ICD10            | I61         | Intracerebral haemorrhage                                                  |
| Stroke or TIA  | ICD10            | I61.0       | Intracerebral haemorrhage in hemisphere, subcortical                       |
| Stroke or TIA  | ICD10            | I61.1       | Intracerebral haemorrhage in hemisphere, cortical                          |
| Stroke or TIA  | ICD10            | I61.2       | Intracerebral haemorrhage in hemisphere, unspecified                       |
| Stroke or TIA  | ICD10            | I61.3       | Intracerebral haemorrhage in brain stem                                    |
| Stroke or TIA  | ICD10            | I61.4       | Intracerebral haemorrhage in cerebellum                                    |
| Stroke or TIA  | ICD10            | I61.5       | Intracerebral haemorrhage, intraventricular                                |
| Stroke or TIA  | ICD10            | I61.6       | Intracerebral haemorrhage, multiple localized                              |
| Stroke or TIA  | ICD10            | I61.8       | Other intracerebral haemorrhage                                            |
| Stroke or TIA  | ICD10            | I61.9       | Intracerebral haemorrhage, unspecified                                     |
| Stroke or TIA  | ICD10            | I62         | Other nontraumatic intracranial haemorrhage                                |
| Stroke or TIA  | ICD10            | I62.0       | Subdural haemorrhage (acute)(nontraumatic)                                 |
| Stroke or TIA  | ICD10            | I62.1       | Nontraumatic extradural haemorrhage                                        |
| Stroke or TIA  | ICD10            | I62.9       | Intracranial haemorrhage (nontraumatic), unspecified                       |
| Stroke or TIA  | ICD10            | I63         | Cerebral infarction                                                        |
| Stroke or TIA  | ICD10            | I63.0       | Cerebral infarction due to thrombosis of precerebral arteries              |

| <b>Outcome</b> | <b>Code type</b> | <b>Code</b> | <b>Code Description</b>                                                              |
|----------------|------------------|-------------|--------------------------------------------------------------------------------------|
| Stroke or TIA  | ICD10            | I63.1       | Cerebral infarction due to embolism of precerebral arteries                          |
| Stroke or TIA  | ICD10            | I63.2       | Cerebral infarction due to unspecified occlusion or stenosis of precerebral arteries |
| Stroke or TIA  | ICD10            | I63.3       | Cerebral infarction due to thrombosis of cerebral arteries                           |
| Stroke or TIA  | ICD10            | I63.4       | Cerebral infarction due to embolism of cerebral arteries                             |
| Stroke or TIA  | ICD10            | I63.5       | Cerebral infarction due to unspecified occlusion or stenosis of cerebral arteries    |
| Stroke or TIA  | ICD10            | I63.6       | Cerebral infarction due to cerebral venous thrombosis, nonpyogenic                   |
| Stroke or TIA  | ICD10            | I63.8       | Other cerebral infarction                                                            |
| Stroke or TIA  | ICD10            | I63.9       | Cerebral infarction, unspecified                                                     |
| Stroke or TIA  | ICD10            | I64         | Stroke, not specified as haemorrhage or infarction                                   |
| Stroke or TIA  | ICD10            | I65         | Occlusion and stenosis of precerebral arteries, not resulting in cerebral infarction |
| Stroke or TIA  | ICD10            | I65.0       | Occlusion and stenosis of vertebral artery                                           |
| Stroke or TIA  | ICD10            | I65.1       | Occlusion and stenosis of basilar artery                                             |
| Stroke or TIA  | ICD10            | I65.2       | Occlusion and stenosis of carotid artery                                             |
| Stroke or TIA  | ICD10            | I65.3       | Occlusion and stenosis of multiple and bilateral precerebral arteries                |
| Stroke or TIA  | ICD10            | I65.8       | Occlusion and stenosis of other precerebral artery                                   |
| Stroke or TIA  | ICD10            | I65.9       | Occlusion and stenosis of unspecified precerebral artery                             |
| Stroke or TIA  | ICD10            | I66         | Occlusion and stenosis of cerebral arteries, not resulting in cerebral infarction    |
| Stroke or TIA  | ICD10            | I66.0       | Occlusion and stenosis of middle cerebral artery                                     |
| Stroke or TIA  | ICD10            | I66.1       | Occlusion and stenosis of anterior cerebral artery                                   |
| Stroke or TIA  | ICD10            | I66.2       | Occlusion and stenosis of posterior cerebral artery                                  |
| Stroke or TIA  | ICD10            | I66.3       | Occlusion and stenosis of cerebellar arteries                                        |
| Stroke or TIA  | ICD10            | I66.4       | Occlusion and stenosis of multiple and bilateral cerebral arteries                   |
| Stroke or TIA  | ICD10            | I66.8       | Occlusion and stenosis of other cerebral artery                                      |
| Stroke or TIA  | ICD10            | I66.9       | Occlusion and stenosis of unspecified cerebral artery                                |
| Stroke or TIA  | ICD10            | I67         | Other cerebrovascular diseases                                                       |
| Stroke or TIA  | ICD10            | I67.8       | Other specified cerebrovascular diseases                                             |
| Stroke or TIA  | ICD10            | I67.9       | Cerebrovascular disease, unspecified                                                 |
| Stroke or TIA  | ICD10            | I68*        | Cerebrovascular disorders in diseases classified elsewhere                           |
| Stroke or TIA  | ICD10            | I68.8*      | Other cerebrovascular disorders in diseases classified elsewhere                     |
| Stroke or TIA  | ICD10            | I69         | Sequelae of cerebrovascular disease                                                  |
| Stroke or TIA  | ICD10            | I69.0       | Sequelae of subarachnoid haemorrhage                                                 |
| Stroke or TIA  | ICD10            | I69.1       | Sequelae of intracerebral haemorrhage                                                |

| <b>Outcome</b> | <b>Code type</b> | <b>Code</b> | <b>Code Description</b>                                        |
|----------------|------------------|-------------|----------------------------------------------------------------|
| Stroke or TIA  | ICD10            | I69.2       | Sequelae of other nontraumatic intracranial haemorrhage        |
| Stroke or TIA  | ICD10            | I69.3       | Sequelae of cerebral infarction                                |
| Stroke or TIA  | ICD10            | I69.4       | Sequelae of stroke, not specified as haemorrhage or infarction |
| Stroke or TIA  | ICD10            | I69.8       | Sequelae of other and unspecified cerebrovascular diseases     |
