# Supplementary material for: Antidepressant use and risk of cardiovascular outcomes in people aged 20 to 64: cohort study using primary care database
Source: PubMed Central journal article supplement (PMC4804126; doi:10.1136/bmj.i1350), 2016-03-22
Supplement: couc027737.ww2_default.pdf [file couc027737.ww2_default.pdf]

# Antidepressant use and risk of cardiovascular outcomes in people aged 20 to 64: cohort study using primary care database

## SUPPLEMENTARY TABLES

|         |                                                                                                                                                                                                                                                                                                                                                                                                        |
|---------|--------------------------------------------------------------------------------------------------------------------------------------------------------------------------------------------------------------------------------------------------------------------------------------------------------------------------------------------------------------------------------------------------------|
| Table A | Numbers of prescriptions for different antidepressants by dose category                                                                                                                                                                                                                                                                                                                                |
| Table B | Adjusted hazard ratios for arrhythmia, myocardial infarction and stroke or transient ischaemic attack by antidepressant class, dose, and individual drug over 5 years follow-up with SSRIs as reference category for analysis of antidepressant class, mid-dose SSRIs as reference category for analysis of antidepressant dose and citalopram as reference category for analysis of individual drugs. |
| Table C | Unadjusted and adjusted hazard ratios for arrhythmia by citalopram split into 3 dose categories for 5 years follow-up.                                                                                                                                                                                                                                                                                 |
| Table D | Unadjusted and adjusted hazard ratios for arrhythmia by antidepressant class, dose and individual drug for 5 years follow-up, excluding untreated patients.                                                                                                                                                                                                                                            |
| Table E | Unadjusted and adjusted hazard ratios for arrhythmia by antidepressant class, dose and individual drug for total follow-up.                                                                                                                                                                                                                                                                            |
| Table F | Adjusted hazard ratios for arrhythmia, myocardial infarction and stroke or transient ischaemic attack by antidepressant class, with separate hazard ratios for 0-1, 1-3 and 3-5 years of follow-up                                                                                                                                                                                                     |
| Table G | Adjusted hazard ratios for arrhythmia, myocardial infarction and stroke or transient ischaemic attack by individual antidepressant drug with separate hazard ratios for 0-1, 1-3 and 3-5 years of follow-up                                                                                                                                                                                            |
| Table H | Unadjusted and adjusted hazard ratios for myocardial infarction by antidepressant class, dose and individual drug for 5 years follow-up, excluding untreated patients.                                                                                                                                                                                                                                 |
| Table I | Unadjusted and adjusted hazard ratios for myocardial infarction by antidepressant class, dose and individual drug for total follow-up.                                                                                                                                                                                                                                                                 |
| Table J | Unadjusted and adjusted hazard ratios for stroke/ transient ischaemic attack by antidepressant class, dose and individual drug for 5 years follow-up, excluding untreated patients.                                                                                                                                                                                                                    |
| Table K | Unadjusted and adjusted hazard ratios for stroke/ transient ischaemic attack by antidepressant class, dose and individual drug for total follow-up.                                                                                                                                                                                                                                                    |
| Table L | Adjusted hazard ratios for arrhythmia by antidepressant class, and individual drug over 5 years adjusting for different subsets of confounders in blocks                                                                                                                                                                                                                                               |
| Table M | Adjusted hazard ratios for myocardial infarction by antidepressant class, and individual drug over 5 years adjusting for different subsets of confounders in blocks                                                                                                                                                                                                                                    |
| Table N | Adjusted hazard ratios for stroke/ transient ischaemic attack by antidepressant class, and individual drug over 5 years adjusting for different subsets of confounders in blocks                                                                                                                                                                                                                       |

**Table A** Numbers of prescriptions for different antidepressant drugs by dose category

| Antidepressant drug                                   | n <sup>1</sup> | % <sup>2</sup> | DDD value<br>(mg/day) | Actual dose prescribed (mg/day) <sup>3</sup> |            |
|-------------------------------------------------------|----------------|----------------|-----------------------|----------------------------------------------|------------|
|                                                       |                |                |                       | Median                                       | IQR        |
| <i>Tricyclic and related antidepressants (TCA)</i>    |                |                |                       |                                              |            |
| Amitriptyline                                         | 236,416        | 7.3            | 75                    | 25                                           | 15 to 50   |
| Dosulepin                                             | 125,302        | 3.9            | 150                   | 75                                           | 50 to 150  |
| Lofepramine                                           | 47,414         | 1.5            | 105                   | 140                                          | 140 to 210 |
| Trazodone                                             | 30,912         | 1.0            | 300                   | 125                                          | 75 to 150  |
| <i>Selective serotonin reuptake inhibitors (SSRI)</i> |                |                |                       |                                              |            |
| Citalopram                                            | 1,023,255      | 31.5           | 20                    | 20                                           | 20 to 20   |
| Escitalopram                                          | 139,190        | 4.3            | 10                    | 10                                           | 10 to 20   |
| Fluoxetine                                            | 778,285        | 23.9           | 20                    | 20                                           | 20 to 20   |
| Paroxetine                                            | 159,389        | 4.9            | 20                    | 20                                           | 20 to 30   |
| Sertraline                                            | 213,749        | 6.6            | 50                    | 50                                           | 50 to 100  |
| <i>Other antidepressants</i>                          |                |                |                       |                                              |            |
| Mirtazapine                                           | 142,400        | 4.4            | 30                    | 30                                           | 15 to 45   |
| Venlafaxine                                           | 205,984        | 6.3            | 100                   | 112.5                                        | 75 to 150  |
| All other antidepressants                             | 66,553         | 2.0            | -                     |                                              |            |
| Combined antidepressants <sup>4</sup>                 | 83,784         | 2.6            | -                     |                                              |            |
| Total prescriptions                                   | 3,252,633      |                |                       |                                              |            |

<sup>1</sup> Number of prescriptions, where prescriptions for the same drug issued on the same day count as a single prescription and the doses have been summed.

<sup>2</sup> Percentage out of total number of prescriptions= 3,252,633

<sup>3</sup> 5.0% of prescriptions had missing information on dosage.

<sup>4</sup> Combined prescriptions for different antidepressant drugs are considered as a single prescription in this table.

DDD = defined daily dose value for the antidepressant drug

**Table B** Adjusted hazard ratios for arrhythmia, myocardial infarction and stroke or transient ischaemic attack by antidepressant class, dose, and individual drug over 5 years follow-up with SSRIs as reference category for analysis of antidepressant class, mid-dose SSRIs as reference category for analysis of antidepressant dose and citalopram as reference category for analysis of individual drugs

|                                                 | Arrhythmia                         |                |         | Myocardial infarction              |                |         | Stroke/TIA                         |                |         |
|-------------------------------------------------|------------------------------------|----------------|---------|------------------------------------|----------------|---------|------------------------------------|----------------|---------|
|                                                 | Adjusted hazard ratio <sup>1</sup> | 95% CI         | P value | Adjusted hazard ratio <sup>1</sup> | 95% CI         | P value | Adjusted hazard ratio <sup>1</sup> | 95% CI         | P value |
| <b>Antidepressant class</b>                     |                                    |                |         |                                    |                |         |                                    |                |         |
| SSRIs                                           | 1.00                               |                |         | 1.00                               |                |         | 1.00                               |                |         |
| TCA                                             | 1.29                               | (1.03 to 1.61) | 0.03    | 1.42                               | (1.08 to 1.86) | 0.012   | 1.14                               | (0.89 to 1.46) | 0.28    |
| Other antidepressants                           | 1.44                               | (1.12 to 1.85) | 0.005   | 1.18                               | (0.81 to 1.71) | 0.39    | 1.11                               | (0.82 to 1.49) | 0.51    |
| Combined antidepressants                        | 1.26                               | (0.64 to 2.51) | 0.51    | 0.67                               | (0.21 to 2.11) | 0.49    | 1.42                               | (0.78 to 2.59) | 0.25    |
| No current use                                  | 1.18                               | (1.03 to 1.37) | 0.02    | 1.18                               | (1.00 to 1.41) | 0.06    | 0.92                               | (0.79 to 1.07) | 0.28    |
| <b>Antidepressant class and dose categories</b> |                                    |                |         |                                    |                |         |                                    |                |         |
| <i>SSRIs:</i>                                   |                                    |                |         |                                    |                |         |                                    |                |         |
| ≤ 0.5 DDD                                       | 1.17                               | (0.80 to 1.73) | 0.42    | 1.32                               | (0.76 to 2.29) | 0.32    | 1.05                               | (0.68 to 1.63) | 0.81    |
| >0.5 DDD/≤ 1.0 DDD                              | 1.00                               |                |         | 1.00                               |                |         | 1.00                               |                |         |
| > 1.0 DDD                                       | 1.24                               | (0.93 to 1.64) | 0.14    | 1.59                               | (1.13 to 2.22) | 0.008   | 1.15                               | (0.87 to 1.51) | 0.32    |
| <i>TCA:</i>                                     |                                    |                |         |                                    |                |         |                                    |                |         |
| ≤ 0.5 DDD                                       | 1.13                               | (0.83 to 1.53) | 0.46    | 1.40                               | (0.95 to 2.07) | 0.09    | 1.04                               | (0.76 to 1.42) | 0.83    |
| >0.5 DDD/≤ 1.0 DDD                              | 1.70                               | (1.13 to 2.54) | 0.010   | 1.76                               | (1.05 to 2.94) | 0.03    | 1.49                               | (1.00 to 2.24) | 0.05    |
| > 1.0 DDD                                       | 1.66                               | (0.97 to 2.86) | 0.07    | 2.18                               | (1.15 to 4.14) | 0.02    | 1.43                               | (0.78 to 2.62) | 0.25    |
| <i>Others:</i>                                  |                                    |                |         |                                    |                |         |                                    |                |         |
| ≤ 0.5 DDD                                       | 1.23                               | (0.65 to 2.35) | 0.52    | 2.46                               | (1.24 to 4.87) | 0.010   | 1.45                               | (0.77 to 2.72) | 0.25    |
| >0.5 DDD/≤ 1.0 DDD                              | 1.46                               | (1.01 to 2.12) | 0.04    | 0.70                               | (0.34 to 1.43) | 0.33    | 0.95                               | (0.61 to 1.50) | 0.84    |
| > 1.0 DDD                                       | 1.62                               | (1.04 to 2.52) | 0.03    | 1.51                               | (0.83 to 2.76) | 0.18    | 1.04                               | (0.60 to 1.78) | 0.90    |
| No current use                                  | 1.26                               | (1.06 to 1.49) | 0.007   | 1.37                               | (1.10 to 1.69) | 0.005   | 0.94                               | (0.80 to 1.11) | 0.47    |
| <b>Antidepressant drug</b>                      |                                    |                |         |                                    |                |         |                                    |                |         |
| <i>SSRIs:</i>                                   |                                    |                |         |                                    |                |         |                                    |                |         |
| Citalopram                                      | 1.00                               |                |         | 1.00                               |                |         | 1.00                               |                |         |
| Escitalopram                                    | 1.23                               | (0.80 to 1.89) | 0.34    | 0.88                               | (0.46 to 1.69) | 0.69    | 0.91                               | (0.55 to 1.50) | 0.71    |
| Fluoxetine                                      | 0.86                               | (0.67 to 1.11) | 0.25    | 0.83                               | (0.58 to 1.17) | 0.29    | 1.07                               | (0.84 to 1.35) | 0.59    |
| Paroxetine                                      | 1.13                               | (0.74 to 1.73) | 0.56    | 0.86                               | (0.48 to 1.55) | 0.62    | 0.90                               | (0.55 to 1.46) | 0.66    |

|                           |      |                |       |      |                |       |      |                |      |
|---------------------------|------|----------------|-------|------|----------------|-------|------|----------------|------|
| Sertraline                | 1.13 | (0.77 to 1.66) | 0.53  | 1.45 | (0.89 to 2.37) | 0.14  | 1.18 | (0.80 to 1.75) | 0.41 |
| <i>TCAs:</i>              |      |                |       |      |                |       |      |                |      |
| Amitriptyline             | 1.35 | (0.99 to 1.84) | 0.06  | 1.33 | (0.88 to 2.00) | 0.17  | 1.27 | (0.91 to 1.77) | 0.16 |
| Dosulepin                 | 1.08 | (0.70 to 1.68) | 0.73  | 1.33 | (0.79 to 2.24) | 0.28  | 1.09 | (0.71 to 1.69) | 0.69 |
| Lofepamine                | 1.94 | (1.16 to 3.27) | 0.012 | 2.30 | (1.24 to 4.25) | 0.008 | 1.65 | (0.88 to 3.09) | 0.12 |
| Trazodone                 | 0.84 | (0.30 to 2.30) | 0.73  | 0.65 | (0.16 to 2.73) | 0.56  | 0.40 | (0.10 to 1.57) | 0.19 |
| <i>Others:</i>            |      |                |       |      |                |       |      |                |      |
| Mirtazapine               | 1.40 | (0.92 to 2.12) | 0.11  | 1.49 | (0.90 to 2.48) | 0.12  | 1.27 | (0.81 to 1.99) | 0.29 |
| Venlafaxine               | 1.48 | (1.03 to 2.13) | 0.03  | 1.01 | (0.57 to 1.79) | 0.98  | 0.99 | (0.61 to 1.59) | 0.95 |
| All other antidepressants | 0.85 | (0.41 to 1.76) | 0.67  | 0.59 | (0.19 to 1.89) | 0.38  | 0.94 | (0.46 to 1.94) | 0.88 |
| Combined antidepressants  | 1.24 | (0.62 to 2.48) | 0.54  | 0.64 | (0.20 to 2.06) | 0.46  | 1.45 | (0.79 to 2.66) | 0.23 |
| No current use            | 1.17 | (0.97 to 1.40) | 0.11  | 1.14 | (0.90 to 1.45) | 0.29  | 0.94 | (0.77 to 1.15) | 0.55 |

---

SSRIs=selective serotonin reuptake inhibitors; TCAs=tricyclic and related antidepressants.

<sup>1</sup> Adjusted for age, sex, year of diagnosis of depression, severity of depression, deprivation, smoking status, alcohol intake, ethnic group (white/not recorded or non-white), coronary heart disease, diabetes, hypertension, cancer, epilepsy/seizures, hypothyroidism, osteoarthritis, asthma/chronic obstructive airways disease, stroke/TIA (except for the stroke/TIA outcome), rheumatoid arthritis, osteoporosis, liver disease, renal disease, obsessive-compulsive disorder, statins, NSAIDs, aspirin, antihypertensive drugs, anticonvulsants, hypnotics/anxiolytics, oral contraceptives, hormone replacement therapy, antipsychotics, bisphosphonates, anticoagulants.

**Table C** Unadjusted and adjusted hazard ratios for arrhythmia over 5 years follow-up with citalopram dose categorised into three categories

| Daily dose of citalopram | No of events * | Person years * | Unadjusted |                |      | Adjusted analysis <sup>1</sup> |                |      |
|--------------------------|----------------|----------------|------------|----------------|------|--------------------------------|----------------|------|
|                          |                |                | HR         | 95% CI         | P    | HR                             | 95% CI         | P    |
| No current use           | 887            | 568,365        | 1.00       |                |      | 1.00                           |                |      |
| Citalopram: ≤20 mg/day   | 115            | 72,340         | 1.05       | (0.86 to 1.28) | 0.65 | 0.82                           | (0.67 to 1.01) | 0.07 |
| Citalopram: 20-39 mg/day | 6              | 3,947          | 0.99       | (0.45 to 2.19) | 0.99 | 0.93                           | (0.42 to 2.06) | 0.87 |
| Citalopram: ≥40 mg/day   | 28             | 13,907         | 1.35       | (0.89 to 2.05) | 0.16 | 1.11                           | (0.72 to 1.71) | 0.62 |

\* Based on numbers in adjusted analysis

<sup>1</sup> Adjusted for age, sex, year of diagnosis of depression, severity of depression, deprivation, smoking status, alcohol intake, ethnic group (white/not recorded; non-white), coronary heart disease, diabetes, hypertension, cancer, epilepsy/seizures, hypothyroidism, osteoarthritis, asthma/chronic obstructive airways disease, stroke/TIA, rheumatoid arthritis, osteoporosis, liver disease, renal disease, obsessive-compulsive disorder, statins, NSAIDs, aspirin, antihypertensive drugs, anticonvulsants, hypnotics/anxiolytics, oral contraceptives, hormone replacement therapy, antipsychotics, bisphosphonates, anticoagulants.

**Table D** Unadjusted and adjusted hazard ratios for arrhythmia by antidepressant class, dose and individual drug for 5 years follow-up, excluding untreated patients

|                                                 | No of events* | Unadjusted analysis |                |        | Adjusted analysis <sup>1</sup> |                |       |
|-------------------------------------------------|---------------|---------------------|----------------|--------|--------------------------------|----------------|-------|
|                                                 |               | HR                  | 95% CI         | P      | HR                             | 95% CI         | P     |
| <b>Antidepressant class</b>                     |               |                     |                |        |                                |                |       |
| No current use                                  | 731           | 1.00                |                |        | 1.00                           |                |       |
| TCAs                                            | 102           | 1.59                | (1.28 to 1.97) | <0.001 | 1.08                           | (0.86 to 1.34) | 0.52  |
| SSRIs                                           | 352           | 1.02                | (0.88 to 1.18) | 0.80   | 0.83                           | (0.71 to 0.96) | 0.012 |
| Other antidepressants                           | 68            | 1.55                | (1.23 to 1.96) | <0.001 | 1.21                           | (0.95 to 1.53) | 0.12  |
| Combined antidepressants                        | 10            | 1.49                | (0.76 to 2.91) | 0.25   | 1.07                           | (0.55 to 2.08) | 0.85  |
| <b>Antidepressant class and dose categories</b> |               |                     |                |        |                                |                |       |
| No current use                                  | 731           | 1.00                |                |        | 1.00                           |                |       |
| <i>TCAs:</i>                                    |               |                     |                |        |                                |                |       |
| ≤ 0.5 DDD                                       | 51            | 1.36                | (1.02 to 1.82) | 0.04   | 0.88                           | (0.66 to 1.18) | 0.39  |
| >0.5 DDD/≤ 1.0 DDD                              | 26            | 2.03                | (1.38 to 2.97) | <0.001 | 1.34                           | (0.90 to 1.99) | 0.15  |
| > 1.0 DDD                                       | 14            | 1.66                | (0.98 to 2.81) | 0.06   | 1.31                           | (0.76 to 2.25) | 0.33  |
| <i>SSRIs:</i>                                   |               |                     |                |        |                                |                |       |
| ≤ 0.5 DDD                                       | 30            | 1.18                | (0.81 to 1.71) | 0.38   | 0.91                           | (0.62 to 1.32) | 0.62  |
| >0.5 DDD/≤ 1.0 DDD                              | 236           | 0.96                | (0.80 to 1.14) | 0.63   | 0.77                           | (0.65 to 0.92) | 0.004 |
| > 1.0 DDD                                       | 75            | 1.17                | (0.91 to 1.5)  | 0.22   | 0.97                           | (0.75 to 1.25) | 0.80  |
| <i>Others:</i>                                  |               |                     |                |        |                                |                |       |
| ≤ 0.5 DDD                                       | 9             | 1.40                | (0.74 to 2.64) | 0.31   | 0.96                           | (0.51 to 1.82) | 0.90  |
| >0.5 DDD/≤ 1.0 DDD                              | 31            | 1.52                | (1.08 to 2.15) | 0.02   | 1.15                           | (0.81 to 1.64) | 0.44  |
| > 1.0 DDD                                       | 20            | 1.50                | (0.98 to 2.31) | 0.06   | 1.28                           | (0.84 to 1.97) | 0.25  |
| <b>Antidepressant drug</b>                      |               |                     |                |        |                                |                |       |
| No current use                                  | 731           | 1.00                |                |        | 1.00                           |                |       |
| <i>TCAs:</i>                                    |               |                     |                |        |                                |                |       |
| Amitriptyline                                   | 54            | 1.75                | (1.32 to 2.33) | <0.001 | 1.15                           | (0.86 to 1.53) | 0.35  |
| Dosulepin                                       | 25            | 1.31                | (0.86 to 1.98) | 0.21   | 0.92                           | (0.60 to 1.39) | 0.68  |
| Lofepramine                                     | 16            | 2.09                | (1.27 to 3.45) | 0.004  | 1.65                           | (0.99 to 2.74) | 0.053 |
| Trazodone                                       | 4             | 1.33                | (0.55 to 3.21) | 0.53   | 0.71                           | (0.26 to 1.93) | 0.50  |
| <i>SSRIs:</i>                                   |               |                     |                |        |                                |                |       |
| Citalopram                                      | 153           | 1.07                | (0.89 to 1.29) | 0.47   | 0.84                           | (0.69 to 1.01) | 0.07  |
| Escitalopram                                    | 26            | 1.33                | (0.91 to 1.94) | 0.15   | 1.04                           | (0.69 to 1.55) | 0.86  |
| Fluoxetine                                      | 111           | 0.86                | (0.68 to 1.08) | 0.20   | 0.72                           | (0.57 to 0.91) | 0.005 |
| Paroxetine                                      | 29            | 1.12                | (0.76 to 1.65) | 0.56   | 0.96                           | (0.65 to 1.42) | 0.84  |
| Sertraline                                      | 33            | 1.15                | (0.80 to 1.66) | 0.45   | 0.95                           | (0.65 to 1.38) | 0.79  |
| <i>Others:</i>                                  |               |                     |                |        |                                |                |       |
| Mirtazapine                                     | 27            | 1.74                | (1.19 to 2.53) | 0.004  | 1.19                           | (0.81 to 1.76) | 0.37  |
| Venlafaxine                                     | 36            | 1.46                | (1.04 to 2.05) | 0.03   | 1.27                           | (0.90 to 1.78) | 0.18  |
| All other antidepressants                       | 8             | 1.02                | (0.51 to 2.03) | 0.96   | 0.72                           | (0.36 to 1.44) | 0.36  |
| Combined antidepressants                        | 10            | 1.49                | (0.76 to 2.90) | 0.25   | 1.06                           | (0.54 to 2.08) | 0.85  |

\* Based on numbers in adjusted analysis

DDD= defined daily dose

<sup>1</sup> Adjusted for age, sex, year of diagnosis of depression, severity of depression, deprivation, smoking status, alcohol intake, ethnic group (white/not recorded or non-white), coronary heart disease, diabetes, hypertension, cancer, epilepsy/seizures, hypothyroidism, osteoarthritis, asthma/chronic obstructive airways disease, stroke/TIA, rheumatoid arthritis, osteoporosis, liver disease, renal disease, obsessive-compulsive disorder, statins, NSAIDs, aspirin, antihypertensive drugs, anticonvulsants, hypnotics/anxiolytics, oral contraceptives, hormone replacement therapy, antipsychotics, bisphosphonates, anticoagulants.

**Table E** Unadjusted and adjusted hazard ratios for arrhythmia by antidepressant class, dose and individual drug for total follow-up period

|                                                 | No of events* | Unadjusted analysis |                |        | Adjusted analysis <sup>1</sup> |                |        |
|-------------------------------------------------|---------------|---------------------|----------------|--------|--------------------------------|----------------|--------|
|                                                 |               | HR                  | 95% CI         | P      | HR                             | 95% CI         | P      |
| <b>Antidepressant class</b>                     |               |                     |                |        |                                |                |        |
| No current use                                  | 1517          | 1.00                |                |        | 1.00                           |                |        |
| TCAs                                            | 165           | 1.60                | (1.37 to 1.88) | <0.001 | 1.10                           | (0.93 to 1.30) | 0.25   |
| SSRIs                                           | 462           | 0.93                | (0.83 to 1.05) | 0.24   | 0.79                           | (0.71 to 0.89) | <0.001 |
| Other antidepressants                           | 104           | 1.48                | (1.23 to 1.79) | <0.001 | 1.21                           | (1.00 to 1.46) | 0.052  |
| Combined antidepressants                        | 17            | 1.26                | (0.77 to 2.05) | 0.35   | 0.94                           | (0.58 to 1.54) | 0.82   |
| <b>Antidepressant class and dose categories</b> |               |                     |                |        |                                |                |        |
| No current use                                  | 1517          | 1.00                |                |        | 1.00                           |                |        |
| <i>TCAs:</i>                                    |               |                     |                |        |                                |                |        |
| ≤ 0.5 DDD                                       | 85            | 1.40                | (1.12 to 1.73) | 0.003  | 0.92                           | (0.74 to 1.15) | 0.48   |
| >0.5 DDD/≤ 1.0 DDD                              | 42            | 2.03                | (1.51 to 2.73) | <0.001 | 1.37                           | (1.01 to 1.85) | 0.045  |
| > 1.0 DDD                                       | 22            | 1.79                | (1.18 to 2.71) | 0.006  | 1.43                           | (0.93 to 2.20) | 0.11   |
| <i>SSRIs:</i>                                   |               |                     |                |        |                                |                |        |
| ≤ 0.5 DDD                                       | 41            | 1.11                | (0.82 to 1.50) | 0.52   | 0.88                           | (0.65 to 1.19) | 0.41   |
| >0.5 DDD/≤ 1.0 DDD                              | 297           | 0.88                | (0.77 to 1.01) | 0.07   | 0.74                           | (0.64 to 0.85) | <0.001 |
| > 1.0 DDD                                       | 107           | 1.02                | (0.83 to 1.25) | 0.87   | 0.90                           | (0.73 to 1.11) | 0.33   |
| <i>Others:</i>                                  |               |                     |                |        |                                |                |        |
| ≤ 0.5 DDD                                       | 11            | 1.03                | (0.58 to 1.82) | 0.92   | 0.77                           | (0.44 to 1.37) | 0.38   |
| >0.5 DDD/≤ 1.0 DDD                              | 47            | 1.50                | (1.12 to 2.00) | 0.006  | 1.18                           | (0.87 to 1.59) | 0.28   |
| > 1.0 DDD                                       | 36            | 1.57                | (1.14 to 2.18) | 0.006  | 1.40                           | (1.02 to 1.93) | 0.037  |
| <b>Antidepressant drug</b>                      |               |                     |                |        |                                |                |        |
| No current use                                  | 1517          | 1.00                |                |        | 1.00                           |                |        |
| <i>TCAs:</i>                                    |               |                     |                |        |                                |                |        |
| Amitriptyline                                   | 92            | 1.67                | (1.35 to 2.05) | <0.001 | 1.14                           | (0.92 to 1.41) | 0.24   |
| Dosulepin                                       | 33            | 1.28                | (0.90 to 1.82) | 0.17   | 0.89                           | (0.63 to 1.27) | 0.53   |
| Lofepramine                                     | 24            | 2.42                | (1.62 to 3.61) | <0.001 | 1.95                           | (1.31 to 2.88) | 0.001  |
| Trazodone                                       | 10            | 1.74                | (0.95 to 3.18) | 0.07   | 1.11                           | (0.59 to 2.08) | 0.74   |
| <i>SSRIs:</i>                                   |               |                     |                |        |                                |                |        |
| Citalopram                                      | 204           | 0.96                | (0.82 to 1.13) | 0.65   | 0.80                           | (0.68 to 0.94) | 0.008  |
| Escitalopram                                    | 32            | 1.13                | (0.79 to 1.62) | 0.49   | 0.92                           | (0.63 to 1.32) | 0.64   |
| Fluoxetine                                      | 143           | 0.82                | (0.68 to 0.98) | 0.03   | 0.72                           | (0.60 to 0.86) | <0.001 |
| Paroxetine                                      | 36            | 1.02                | (0.72 to 1.45) | 0.90   | 0.87                           | (0.61 to 1.24) | 0.44   |
| Sertraline                                      | 47            | 1.05                | (0.78 to 1.41) | 0.74   | 0.91                           | (0.67 to 1.23) | 0.54   |
| <i>Others:</i>                                  |               |                     |                |        |                                |                |        |
| Mirtazapine                                     | 42            | 1.61                | (1.20 to 2.15) | 0.001  | 1.20                           | (0.89 to 1.62) | 0.23   |
| Venlafaxine                                     | 53            | 1.40                | (1.07 to 1.83) | 0.013  | 1.24                           | (0.95 to 1.62) | 0.12   |
| All other antidepressants                       | 15            | 1.14                | (0.69 to 1.87) | 0.60   | 0.74                           | (0.43 to 1.26) | 0.27   |
| Combined antidepressants                        | 17            | 1.26                | (0.77 to 2.05) | 0.35   | 0.94                           | (0.58 to 1.54) | 0.81   |

\* Based on numbers in adjusted analysis

DDD= defined daily dose

<sup>1</sup> Adjusted for age, sex, year of diagnosis of depression, severity of depression, deprivation, smoking status, alcohol intake, ethnic group (white/not recorded or non-white), coronary heart disease, diabetes, hypertension, cancer, epilepsy/seizures, hypothyroidism, osteoarthritis, asthma/chronic obstructive airways disease, stroke/TIA, rheumatoid arthritis, osteoporosis, liver disease, renal disease, obsessive-compulsive disorder, statins, NSAIDs, aspirin, antihypertensive drugs, anticonvulsants, hypnotics/anxiolytics, oral contraceptives, hormone replacement therapy, antipsychotics, bisphosphonates, anticoagulants.

**Table F** Adjusted hazard ratios for arrhythmia, myocardial infarction and stroke or transient ischaemic attack by antidepressant class split over years 0-1, 1-3, and 3-5 years of follow-up

| Drug class by year of follow-up | Arrhythmia                         |                |       | Myocardial infarction              |                |       | Stroke/TIA                         |                |       |
|---------------------------------|------------------------------------|----------------|-------|------------------------------------|----------------|-------|------------------------------------|----------------|-------|
|                                 | Adjusted hazard ratio <sup>1</sup> | 95% CI         | P     | Adjusted hazard ratio <sup>1</sup> | 95% CI         | P     | Adjusted hazard ratio <sup>1</sup> | 95% CI         | P     |
| <i>TCA</i> s:                   |                                    |                |       |                                    |                |       |                                    |                |       |
| 0-1 years                       | 1.16                               | (0.81 to 1.66) | 0.42  | 1.07                               | (0.71 to 1.62) | 0.73  | 1.03                               | (0.70 to 1.51) | 0.90  |
| 1-3 years                       | 1.23                               | (0.89 to 1.70) | 0.21  | 1.24                               | (0.82 to 1.88) | 0.30  | 1.08                               | (0.72 to 1.62) | 0.70  |
| 3-5 years                       | 0.85                               | (0.56 to 1.27) | 0.42  | 1.12                               | (0.68 to 1.85) | 0.64  | 1.62                               | (1.10 to 2.37) | 0.014 |
| <i>SSRI</i> s:                  |                                    |                |       |                                    |                |       |                                    |                |       |
| 0-1 years                       | 0.85                               | (0.66 to 1.10) | 0.21  | 0.59                               | (0.43 to 0.81) | 0.001 | 0.84                               | (0.64 to 1.10) | 0.21  |
| 1-3 years                       | 0.90                               | (0.73 to 1.10) | 0.31  | 0.88                               | (0.68 to 1.15) | 0.36  | 1.09                               | (0.87 to 1.37) | 0.45  |
| 3-5 years                       | 0.79                               | (0.62 to 1.00) | 0.052 | 1.14                               | (0.83 to 1.57) | 0.41  | 1.37                               | (1.06 to 1.75) | 0.014 |
| <i>Others</i> :                 |                                    |                |       |                                    |                |       |                                    |                |       |
| 0-1 years                       | 1.36                               | (0.86 to 2.15) | 0.19  | 0.82                               | (0.43 to 1.58) | 0.55  | 1.18                               | (0.71 to 1.95) | 0.53  |
| 1-3 years                       | 1.09                               | (0.73 to 1.61) | 0.68  | 0.97                               | (0.56 to 1.69) | 0.91  | 1.37                               | (0.90 to 2.08) | 0.15  |
| 3-5 years                       | 1.28                               | (0.83 to 1.98) | 0.27  | 1.14                               | (0.62 to 2.10) | 0.68  | 0.90                               | (0.50 to 1.62) | 0.72  |

SSRIs=selective serotonin reuptake inhibitors; TCAs=tricyclic and related antidepressants.

<sup>1</sup> Adjusted for age, sex, year of diagnosis of depression, severity of depression, deprivation, smoking status, alcohol intake, ethnic group (white/not recorded or non-white), coronary heart disease, diabetes, hypertension, cancer, epilepsy/seizures, hypothyroidism, osteoarthritis, asthma/chronic obstructive airways disease, stroke/TIA (except for the stroke/TIA outcome), rheumatoid arthritis, osteoporosis, liver disease, renal disease, obsessive-compulsive disorder, statins, NSAIDs, aspirin, antihypertensive drugs, anticonvulsants, hypnotics/anxiolytics, oral contraceptives, hormone replacement therapy, antipsychotics, bisphosphonates, anticoagulants. Model also included terms for combined antidepressant treatment.

Reference group is no current use of antidepressants in each specific time interval.



**Table G** Adjusted hazard ratios for arrhythmia, myocardial infarction and stroke or transient ischaemic attack for five antidepressant drugs split over years 0-1, 1-3, and 3-5 years of follow-up

| Drug by year of follow-up              | Arrhythmia                         |                |       | Myocardial infarction              |                |       | Stroke/TIA                         |                |       |
|----------------------------------------|------------------------------------|----------------|-------|------------------------------------|----------------|-------|------------------------------------|----------------|-------|
|                                        | Adjusted hazard ratio <sup>1</sup> | 95% CI         | P     | Adjusted hazard ratio <sup>1</sup> | 95% CI         | P     | Adjusted hazard ratio <sup>1</sup> | 95% CI         | P     |
| <i>Amitriptyline</i>                   |                                    |                |       |                                    |                |       |                                    |                |       |
| 0-1 years                              | 1.19                               | (0.71 to 2.00) | 0.50  | 0.77                               | (0.37 to 1.56) | 0.46  | 1.02                               | (0.59 to 1.74) | 0.95  |
| 1-3 years                              | 1.31                               | (0.85 to 2.02) | 0.22  | 1.90                               | (1.18 to 3.06) | 0.009 | 1.29                               | (0.78 to 2.13) | 0.31  |
| 3-5 years                              | 0.98                               | (0.59 to 1.62) | 0.94  | 0.68                               | (0.29 to 1.60) | 0.38  | 1.70                               | (1.03 to 2.80) | 0.037 |
| <i>Citalopram</i>                      |                                    |                |       |                                    |                |       |                                    |                |       |
| 0-1 years                              | 0.81                               | (0.58 to 1.12) | 0.20  | 0.62                               | (0.40 to 0.96) | 0.030 | 0.75                               | (0.52 to 1.07) | 0.12  |
| 1-3 years                              | 1.07                               | (0.83 to 1.39) | 0.60  | 0.78                               | (0.52 to 1.18) | 0.24  | 1.00                               | (0.73 to 1.37) | 0.98  |
| 3-5 years                              | 0.66                               | (0.46 to 0.97) | 0.032 | 1.37                               | (0.91 to 2.04) | 0.13  | 1.57                               | (1.14 to 2.17) | 0.006 |
| <i>Fluoxetine</i>                      |                                    |                |       |                                    |                |       |                                    |                |       |
| 0-1 years                              | 0.77                               | (0.54 to 1.09) | 0.14  | 0.44                               | (0.27 to 0.73) | 0.001 | 1.06                               | (0.75 to 1.48) | 0.75  |
| 1-3 years                              | 0.70                               | (0.50 to 0.99) | 0.046 | 0.98                               | (0.66 to 1.48) | 0.94  | 1.09                               | (0.79 to 1.50) | 0.61  |
| 3-5 years                              | 0.78                               | (0.53 to 1.16) | 0.22  | 0.79                               | (0.43 to 1.46) | 0.46  | 1.08                               | (0.69 to 1.69) | 0.75  |
| <i>Sertraline</i>                      |                                    |                |       |                                    |                |       |                                    |                |       |
| 0-1 years                              | 1.23                               | (0.72 to 2.08) | 0.45  | 1.22                               | (0.66 to 2.25) | 0.54  | 0.65                               | (0.31 to 1.39) | 0.27  |
| 1-3 years                              | 0.80                               | (0.43 to 1.49) | 0.49  | 0.90                               | (0.41 to 1.98) | 0.80  | 1.60                               | (0.94 to 2.73) | 0.08  |
| 3-5 years                              | 0.89                               | (0.44 to 1.80) | 0.74  | 1.70                               | (0.79 to 3.65) | 0.17  | 1.61                               | (0.84 to 3.11) | 0.15  |
| <i>Venlafaxine</i>                     |                                    |                |       |                                    |                |       |                                    |                |       |
| 0-1 years                              | 1.61                               | (0.87 to 2.98) | 0.13  | 0.84                               | (0.32 to 2.23) | 0.73  | 0.50                               | (0.16 to 1.55) | 0.23  |
| 1-3 years                              | 1.06                               | (0.63 to 1.81) | 0.82  | 0.59                               | (0.22 to 1.61) | 0.31  | 1.29                               | (0.72 to 2.33) | 0.39  |
| 3-5 years                              | 1.32                               | (0.76 to 2.31) | 0.32  | 1.30                               | (0.57 to 2.93) | 0.53  | 1.18                               | (0.57 to 2.47) | 0.66  |
| <i>All others (including combined)</i> |                                    |                |       |                                    |                |       |                                    |                |       |
| 0-1 years                              | 1.16                               | (0.85 to 1.57) | 0.35  | 0.92                               | (0.62 to 1.35) | 0.66  | 0.97                               | (0.68 to 1.38) | 0.86  |
| 1-3 years                              | 1.00                               | (0.75 to 1.34) | 0.98  | 0.89                               | (0.59 to 1.32) | 0.56  | 1.18                               | (0.84 to 1.64) | 0.34  |
| 3-5 years                              | 0.98                               | (0.69 to 1.39) | 0.90  | 1.08                               | (0.68 to 1.72) | 0.75  | 1.17                               | (0.79 to 1.74) | 0.42  |

<sup>1</sup> Adjusted for age, sex, year of diagnosis of depression, severity of depression, deprivation, smoking status, alcohol intake, ethnic group (white/not recorded or non-white), coronary heart disease, diabetes, hypertension, cancer, epilepsy/seizures, hypothyroidism, osteoarthritis, asthma/chronic obstructive airways disease, stroke/TIA (except for the stroke/TIA outcome), rheumatoid arthritis, osteoporosis, liver disease, renal disease, obsessive-compulsive disorder, statins, NSAIDs, aspirin, antihypertensive drugs, anticonvulsants, hypnotics/anxiolytics, oral contraceptives, hormone replacement therapy, antipsychotics, bisphosphonates, anticoagulants.

Reference group is no current use of antidepressants in each specific time interval.

**Table H** Unadjusted and adjusted hazard ratios for myocardial infarction by antidepressant class, dose and individual drug for 5 years follow-up, excluding untreated patients

|                                                 | No of events* | Unadjusted analysis |                |        | Adjusted analysis <sup>1</sup> |                |       |
|-------------------------------------------------|---------------|---------------------|----------------|--------|--------------------------------|----------------|-------|
|                                                 |               | HR                  | 95% CI         | P      | HR                             | 95% CI         | P     |
| <b>Antidepressant class</b>                     |               |                     |                |        |                                |                |       |
| No current use                                  | 397           | 1.00                |                |        | 1.00                           |                |       |
| TCAs                                            | 63            | 1.83                | (1.43 to 2.35) | <0.001 | 1.19                           | (0.93 to 1.52) | 0.16  |
| SSRIs                                           | 182           | 1.02                | (0.86 to 1.23) | 0.79   | 0.84                           | (0.70 to 1.00) | 0.051 |
| Other antidepressants                           | 33            | 1.38                | (0.97 to 1.98) | 0.08   | 0.98                           | (0.68 to 1.40) | 0.89  |
| Combined antidepressants                        | 3             | 0.83                | (0.27 to 2.55) | 0.75   | 0.56                           | (0.18 to 1.72) | 0.31  |
| <b>Antidepressant class and dose categories</b> |               |                     |                |        |                                |                |       |
| No current use                                  | 397           | 1.00                |                |        | 1.00                           |                |       |
| <i>TCAs:</i>                                    |               |                     |                |        |                                |                |       |
| ≤ 0.5 DDD                                       | 31            | 1.60                | (1.12 to 2.28) | 0.010  | 1.02                           | (0.72 to 1.46) | 0.89  |
| >0.5 DDD/≤ 1.0 DDD                              | 15            | 2.14                | (1.30 to 3.52) | 0.003  | 1.28                           | (0.77 to 2.11) | 0.34  |
| > 1.0 DDD                                       | 10            | 2.24                | (1.2 to 4.17)  | 0.011  | 1.57                           | (0.84 to 2.94) | 0.15  |
| <i>SSRIs:</i>                                   |               |                     |                |        |                                |                |       |
| ≤ 0.5 DDD                                       | 14            | 1.13                | (0.68 to 1.86) | 0.64   | 0.96                           | (0.57 to 1.61) | 0.87  |
| >0.5 DDD/≤ 1.0 DDD                              | 110           | 0.90                | (0.72 to 1.12) | 0.34   | 0.73                           | (0.58 to 0.91) | 0.005 |
| > 1.0 DDD                                       | 50            | 1.45                | (1.09 to 1.91) | 0.010  | 1.14                           | (0.85 to 1.52) | 0.39  |
| <i>Others:</i>                                  |               |                     |                |        |                                |                |       |
| ≤ 0.5 DDD                                       | 9             | 2.64                | (1.37 to 5.10) | 0.004  | 1.77                           | (0.91 to 3.43) | 0.09  |
| >0.5 DDD/≤ 1.0 DDD                              | 8             | 0.71                | (0.36 to 1.42) | 0.34   | 0.50                           | (0.25 to 1.01) | 0.052 |
| > 1.0 DDD                                       | 11            | 1.52                | (0.84 to 2.76) | 0.17   | 1.08                           | (0.59 to 1.96) | 0.81  |
| <b>Antidepressant drug</b>                      |               |                     |                |        |                                |                |       |
| No current use                                  | 397           |                     |                |        | 1.00                           |                |       |
| <i>TCAs:</i>                                    |               |                     |                |        |                                |                |       |
| Amitriptyline                                   | 30            | 1.84                | (1.28 to 2.63) | 0.001  | 1.16                           | (0.81 to 1.66) | 0.41  |
| Dosulepin                                       | 18            | 1.80                | (1.14 to 2.83) | 0.011  | 1.16                           | (0.74 to 1.83) | 0.51  |
| Lofepamine                                      | 11            | 2.74                | (1.54 to 4.86) | 0.001  | 2.00                           | (1.13 to 3.56) | 0.018 |
| Trazodone                                       | 2             | 1.01                | (0.25 to 4.05) | 0.99   | 0.57                           | (0.14 to 2.29) | 0.43  |
| <i>SSRIs:</i>                                   |               |                     |                |        |                                |                |       |
| Citalopram                                      | 79            | 1.05                | (0.82 to 1.34) | 0.69   | 0.87                           | (0.68 to 1.12) | 0.27  |
| Escitalopram                                    | 10            | 0.89                | (0.48 to 1.67) | 0.72   | 0.76                           | (0.40 to 1.42) | 0.38  |
| Fluoxetine                                      | 56            | 0.89                | (0.67 to 1.19) | 0.43   | 0.72                           | (0.53 to 0.97) | 0.031 |
| Paroxetine                                      | 13            | 1.02                | (0.60 to 1.73) | 0.94   | 0.75                           | (0.43 to 1.29) | 0.29  |
| Sertraline                                      | 23            | 1.52                | (1.00 to 2.31) | 0.048  | 1.25                           | (0.82 to 1.91) | 0.31  |
| <i>Others:</i>                                  |               |                     |                |        |                                |                |       |
| Mirtazapine                                     | 19            | 2.20                | (1.36 to 3.54) | 0.001  | 1.29                           | (0.79 to 2.10) | 0.30  |
| Venlafaxine                                     | 14            | 1.05                | (0.62 to 1.79) | 0.85   | 0.86                           | (0.51 to 1.47) | 0.59  |
| All other antidepressants                       | 3             | 0.72                | (0.24 to 2.20) | 0.57   | 0.51                           | (0.17 to 1.56) | 0.24  |
| Combined antidepressants                        | 3             | 0.83                | (0.27 to 2.55) | 0.75   | 0.56                           | (0.18 to 1.72) | 0.31  |

\* Based on numbers in adjusted analysis

DDD= defined daily dose

<sup>1</sup> Adjusted for age, sex, year of diagnosis of depression, severity of depression, deprivation, smoking status, alcohol intake, ethnic group (white/not recorded or non-white), coronary heart disease, diabetes, hypertension, cancer, epilepsy/seizures, hypothyroidism, osteoarthritis, asthma/chronic obstructive airways disease, stroke/TIA, rheumatoid arthritis, osteoporosis, liver disease, renal disease, obsessive-compulsive disorder, statins, NSAIDs, aspirin, antihypertensive drugs, anticonvulsants, hypnotics/anxiolytics, oral contraceptives, hormone replacement therapy, antipsychotics, bisphosphonates, anticoagulants.

**Table I** Unadjusted and adjusted hazard ratios for myocardial infarction by antidepressant class, dose and individual drug for total follow-up period

|                                                 | No of events* | Unadjusted analysis |                |        | Adjusted analysis <sup>1</sup> |                |       |
|-------------------------------------------------|---------------|---------------------|----------------|--------|--------------------------------|----------------|-------|
|                                                 |               | HR                  | 95% CI         | P      | HR                             | 95% CI         | P     |
| <b>Antidepressant class</b>                     |               |                     |                |        |                                |                |       |
| No current use                                  | 783           | 1.00                |                |        | 1.00                           |                |       |
| TCAs                                            | 93            | 1.78                | (1.44 to 2.19) | <0.001 | 1.18                           | (0.96 to 1.45) | 0.12  |
| SSRIs                                           | 260           | 1.02                | (0.89 to 1.18) | 0.75   | 0.88                           | (0.76 to 1.02) | 0.080 |
| Other antidepressants                           | 60            | 1.66                | (1.28 to 2.17) | <0.001 | 1.22                           | (0.93 to 1.60) | 0.16  |
| Combined antidepressants                        | 8             | 1.17                | (0.60 to 2.30) | 0.65   | 0.81                           | (0.41 to 1.60) | 0.55  |
| <b>Antidepressant class and dose categories</b> |               |                     |                |        |                                |                |       |
| No current use                                  | 783           | 1.00                |                |        | 1.00                           |                |       |
| <i>TCAs:</i>                                    |               |                     |                |        |                                |                |       |
| ≤ 0.5 DDD                                       | 46            | 1.51                | (1.11 to 2.04) | 0.008  | 0.98                           | (0.73 to 1.33) | 0.90  |
| >0.5 DDD/≤ 1.0 DDD                              | 25            | 2.38                | (1.61 to 3.53) | <0.001 | 1.44                           | (0.97 to 2.15) | 0.072 |
| > 1.0 DDD                                       | 14            | 2.23                | (1.32 to 3.75) | 0.003  | 1.62                           | (0.97 to 2.71) | 0.065 |
| <i>SSRIs:</i>                                   |               |                     |                |        |                                |                |       |
| ≤ 0.5 DDD                                       | 21            | 1.11                | (0.73 to 1.69) | 0.63   | 0.97                           | (0.63 to 1.48) | 0.87  |
| >0.5 DDD/≤ 1.0 DDD                              | 160           | 0.94                | (0.79 to 1.12) | 0.52   | 0.80                           | (0.67 to 0.96) | 0.015 |
| > 1.0 DDD                                       | 71            | 1.31                | (1.03 to 1.67) | 0.030  | 1.11                           | (0.87 to 1.43) | 0.41  |
| <i>Others:</i>                                  |               |                     |                |        |                                |                |       |
| ≤ 0.5 DDD                                       | 13            | 2.39                | (1.39 to 4.11) | 0.002  | 1.76                           | (1.02 to 3.04) | 0.041 |
| >0.5 DDD/≤ 1.0 DDD                              | 16            | 1.00                | (0.62 to 1.61) | 1.00   | 0.71                           | (0.44 to 1.15) | 0.17  |
| > 1.0 DDD                                       | 25            | 2.13                | (1.40 to 3.23) | <0.001 | 1.56                           | (1.02 to 2.40) | 0.040 |
| <b>Antidepressant drug</b>                      |               |                     |                |        |                                |                |       |
| No current use                                  | 783           | 1.00                |                |        | 1.00                           |                |       |
| <i>TCAs:</i>                                    |               |                     |                |        |                                |                |       |
| Amitriptyline                                   | 49            | 1.75                | (1.33 to 2.31) | <0.001 | 1.14                           | (0.86 to 1.51) | 0.36  |
| Dosulepin                                       | 25            | 1.90                | (1.29 to 2.79) | 0.001  | 1.27                           | (0.86 to 1.87) | 0.22  |
| Lofepamine                                      | 13            | 2.55                | (1.51 to 4.30) | <0.001 | 1.90                           | (1.15 to 3.12) | 0.012 |
| Trazodone                                       | 2             | 0.68                | (0.17 to 2.70) | 0.58   | 0.38                           | (0.09 to 1.52) | 0.17  |
| <i>SSRIs:</i>                                   |               |                     |                |        |                                |                |       |
| Citalopram                                      | 113           | 1.04                | (0.85 to 1.27) | 0.70   | 0.91                           | (0.74 to 1.12) | 0.36  |
| Escitalopram                                    | 13            | 0.89                | (0.52 to 1.53) | 0.67   | 0.79                           | (0.46 to 1.35) | 0.38  |
| Fluoxetine                                      | 78            | 0.87                | (0.69 to 1.10) | 0.25   | 0.74                           | (0.58 to 0.95) | 0.019 |
| Paroxetine                                      | 21            | 1.16                | (0.75 to 1.78) | 0.51   | 0.87                           | (0.56 to 1.35) | 0.53  |
| Sertraline                                      | 33            | 1.44                | (1.02 to 2.04) | 0.039  | 1.27                           | (0.90 to 1.81) | 0.18  |
| <i>Others:</i>                                  |               |                     |                |        |                                |                |       |
| Mirtazapine                                     | 32            | 2.38                | (1.67 to 3.40) | <0.001 | 1.48                           | (1.03 to 2.14) | 0.036 |
| Venlafaxine                                     | 27            | 1.39                | (0.95 to 2.04) | 0.093  | 1.15                           | (0.78 to 1.70) | 0.48  |
| All other antidepressants                       | 7             | 1.04                | (0.46 to 2.38) | 0.92   | 0.80                           | (0.35 to 1.84) | 0.60  |
| Combined antidepressants                        | 8             | 1.17                | (0.60 to 2.30) | 0.65   | 0.81                           | (0.41 to 1.60) | 0.55  |

\* Based on numbers in adjusted analysis

DDD= defined daily dose

<sup>1</sup> Adjusted for age, sex, year of diagnosis of depression, severity of depression, deprivation, smoking status, alcohol intake, ethnic group (white/not recorded or non-white), coronary heart disease, diabetes, hypertension, cancer, epilepsy/seizures, hypothyroidism, osteoarthritis, asthma/chronic obstructive airways disease, stroke/TIA, rheumatoid arthritis, osteoporosis, liver disease, renal disease, obsessive-compulsive disorder, statins, NSAIDs, aspirin, antihypertensive drugs, anticonvulsants, hypnotics/anxiolytics, oral contraceptives, hormone replacement therapy, antipsychotics, bisphosphonates, anticoagulants.

**Table J** Unadjusted and adjusted hazard ratios for stroke/TIA by antidepressant class, dose and individual drug for 5 years follow-up, excluding untreated patients

|                                                 | No of events* | Unadjusted analysis |                |        | Adjusted analysis <sup>1</sup> |                |       |
|-------------------------------------------------|---------------|---------------------|----------------|--------|--------------------------------|----------------|-------|
|                                                 |               | HR                  | 95% CI         | P      | HR                             | 95% CI         | P     |
| <b>Antidepressant class</b>                     |               |                     |                |        |                                |                |       |
| No current use                                  | 525           | 1.00                |                |        | 1.00                           |                |       |
| TCAs                                            | 90            | 1.93                | (1.52 to 2.46) | <0.001 | 1.19                           | (0.93 to 1.51) | 0.17  |
| SSRIs                                           | 313           | 1.26                | (1.08 to 1.48) | 0.003  | 1.04                           | (0.89 to 1.21) | 0.65  |
| Other antidepressants                           | 50            | 1.66                | (1.25 to 2.20) | <0.001 | 1.15                           | (0.86 to 1.53) | 0.36  |
| Combined antidepressants                        | 11            | 2.51                | (1.42 to 4.43) | 0.001  | 1.47                           | (0.81 to 2.65) | 0.20  |
| <b>Antidepressant class and dose categories</b> |               |                     |                |        |                                |                |       |
| No current use                                  | 525           | 1.00                |                |        | 1.00                           |                |       |
| <i>TCAs:</i>                                    |               |                     |                |        |                                |                |       |
| ≤ 0.5 DDD                                       | 48            | 1.80                | (1.32 to 2.45) | <0.001 | 1.05                           | (0.77 to 1.43) | 0.75  |
| >0.5 DDD/≤ 1.0 DDD                              | 24            | 2.54                | (1.72 to 3.77) | <0.001 | 1.51                           | (1.02 to 2.26) | 0.042 |
| > 1.0 DDD                                       | 12            | 2.00                | (1.10 to 3.66) | 0.024  | 1.44                           | (0.79 to 2.62) | 0.24  |
| <i>SSRIs:</i>                                   |               |                     |                |        |                                |                |       |
| ≤ 0.5 DDD                                       | 24            | 1.33                | (0.86 to 2.06) | 0.20   | 1.07                           | (0.69 to 1.66) | 0.76  |
| >0.5 DDD/≤ 1.0 DDD                              | 216           | 1.25                | (1.05 to 1.49) | 0.011  | 1.01                           | (0.85 to 1.20) | 0.88  |
| > 1.0 DDD                                       | 66            | 1.40                | (1.08 to 1.81) | 0.012  | 1.16                           | (0.89 to 1.51) | 0.28  |
| <i>Others:</i>                                  |               |                     |                |        |                                |                |       |
| ≤ 0.5 DDD                                       | 10            | 2.18                | (1.17 to 4.07) | 0.014  | 1.47                           | (0.78 to 2.76) | 0.23  |
| >0.5 DDD/≤ 1.0 DDD                              | 20            | 1.46                | (0.96 to 2.24) | 0.08   | 0.97                           | (0.62 to 1.51) | 0.88  |
| > 1.0 DDD                                       | 13            | 1.36                | (0.80 to 2.31) | 0.26   | 1.05                           | (0.61 to 1.79) | 0.87  |
| <b>Antidepressant drug</b>                      |               |                     |                |        |                                |                |       |
| No current use                                  | 525           | 1.00                |                |        | 1.00                           |                |       |
| <i>TCAs:</i>                                    |               |                     |                |        |                                |                |       |
| Amitriptyline                                   | 49            | 2.21                | (1.64 to 2.99) | <0.001 | 1.29                           | (0.95 to 1.75) | 0.10  |
| Dosulepin                                       | 24            | 1.76                | (1.17 to 2.66) | 0.007  | 1.11                           | (0.74 to 1.68) | 0.62  |
| Lofepramine                                     | 12            | 2.21                | (1.21 to 4.05) | 0.010  | 1.66                           | (0.91 to 3.04) | 0.10  |
| Trazodone                                       | 2             | 0.75                | (0.19 to 2.97) | 0.68   | 0.41                           | (0.11 to 1.58) | 0.20  |
| <i>SSRIs:</i>                                   |               |                     |                |        |                                |                |       |
| Citalopram                                      | 128           | 1.21                | (0.99 to 1.48) | 0.06   | 1.01                           | (0.83 to 1.24) | 0.89  |
| Escitalopram                                    | 17            | 1.12                | (0.68 to 1.84) | 0.65   | 0.92                           | (0.56 to 1.52) | 0.75  |
| Fluoxetine                                      | 117           | 1.32                | (1.07 to 1.62) | 0.009  | 1.08                           | (0.88 to 1.33) | 0.47  |
| Paroxetine                                      | 21            | 1.18                | (0.76 to 1.84) | 0.46   | 0.91                           | (0.58 to 1.43) | 0.68  |
| Sertraline                                      | 30            | 1.50                | (1.03 to 2.18) | 0.032  | 1.20                           | (0.82 to 1.74) | 0.35  |
| <i>Others:</i>                                  |               |                     |                |        |                                |                |       |
| Mirtazapine                                     | 24            | 2.16                | (1.46 to 3.20) | <0.001 | 1.29                           | (0.86 to 1.94) | 0.22  |
| Venlafaxine                                     | 21            | 1.30                | (0.85 to 1.98) | 0.23   | 1.00                           | (0.64 to 1.56) | 1.00  |
| All other antidepressants                       | 8             | 1.43                | (0.71 to 2.88) | 0.32   | 0.96                           | (0.48 to 1.93) | 0.90  |
| Combined antidepressants                        | 11            | 2.51                | (1.42 to 4.43) | 0.001  | 1.47                           | (0.81 to 2.65) | 0.20  |

\* Based on numbers in adjusted analysis

DDD= defined daily dose

<sup>1</sup> Adjusted for age, sex, year of diagnosis of depression, severity of depression, deprivation, smoking status, alcohol intake, ethnic group (white/not recorded or non-white), coronary heart disease, diabetes, hypertension, cancer, epilepsy/seizures, hypothyroidism, osteoarthritis, asthma/chronic obstructive airways disease, rheumatoid arthritis, osteoporosis, liver disease, renal disease, obsessive-compulsive disorder, statins, NSAIDs, aspirin, antihypertensive drugs, anticonvulsants, hypnotics/anxiolytics, oral contraceptives, hormone replacement therapy, antipsychotics, bisphosphonates, anticoagulants.

**Table K** Unadjusted and adjusted hazard ratios for stroke/TIA by antidepressant class, dose and individual drug for total follow-up period

|                                                 | No of events* | Unadjusted analysis |                |        | Adjusted analysis <sup>1</sup> |                |       |
|-------------------------------------------------|---------------|---------------------|----------------|--------|--------------------------------|----------------|-------|
|                                                 |               | HR                  | 95% CI         | P      | HR                             | 95% CI         | P     |
| <b>Antidepressant class</b>                     |               |                     |                |        |                                |                |       |
| No current use                                  | 1082          | 1.00                |                |        | 1.00                           |                |       |
| TCAs                                            | 138           | 1.92                | (1.59 to 2.31) | <0.001 | 1.23                           | (1.01 to 1.49) | 0.036 |
| SSRIs                                           | 447           | 1.28                | (1.14 to 1.44) | <0.001 | 1.10                           | (0.98 to 1.24) | 0.12  |
| Other antidepressants                           | 81            | 1.63                | (1.31 to 2.04) | <0.001 | 1.20                           | (0.96 to 1.50) | 0.11  |
| Combined antidepressants                        | 21            | 2.22                | (1.47 to 3.35) | <0.001 | 1.44                           | (0.94 to 2.20) | 0.09  |
| <b>Antidepressant class and dose categories</b> |               |                     |                |        |                                |                |       |
| No current use                                  | 1082          | 1.00                |                |        | 1.00                           |                |       |
| <i>TCAs:</i>                                    |               |                     |                |        |                                |                |       |
| ≤ 0.5 DDD                                       | 80            | 1.89                | (1.49 to 2.38) | <0.001 | 1.17                           | (0.92 to 1.48) | 0.20  |
| >0.5 DDD/≤ 1.0 DDD                              | 31            | 2.14                | (1.53 to 3.01) | <0.001 | 1.32                           | (0.93 to 1.86) | 0.12  |
| > 1.0 DDD                                       | 16            | 1.86                | (1.12 to 3.09) | 0.017  | 1.33                           | (0.78 to 2.26) | 0.29  |
| <i>SSRIs:</i>                                   |               |                     |                |        |                                |                |       |
| ≤ 0.5 DDD                                       | 32            | 1.22                | (0.83 to 1.80) | 0.30   | 1.02                           | (0.69 to 1.49) | 0.94  |
| >0.5 DDD/≤ 1.0 DDD                              | 293           | 1.25                | (1.08 to 1.44) | 0.002  | 1.05                           | (0.92 to 1.21) | 0.46  |
| > 1.0 DDD                                       | 112           | 1.50                | (1.24 to 1.82) | <0.001 | 1.32                           | (1.08 to 1.61) | 0.006 |
| <i>Others:</i>                                  |               |                     |                |        |                                |                |       |
| ≤ 0.5 DDD                                       | 14            | 1.86                | (1.11 to 3.12) | 0.018  | 1.37                           | (0.81 to 2.29) | 0.24  |
| >0.5 DDD/≤ 1.0 DDD                              | 32            | 1.45                | (1.03 to 2.05) | 0.033  | 1.02                           | (0.72 to 1.46) | 0.90  |
| > 1.0 DDD                                       | 26            | 1.60                | (1.07 to 2.42) | 0.024  | 1.27                           | (0.85 to 1.90) | 0.25  |
| <b>Antidepressant drug</b>                      |               |                     |                |        |                                |                |       |
| No current use                                  | 1082          | 1.00                |                |        | 1.00                           |                |       |
| <i>TCAs:</i>                                    |               |                     |                |        |                                |                |       |
| Amitriptyline                                   | 79            | 2.05                | (1.63 to 2.58) | <0.001 | 1.28                           | (1.01 to 1.62) | 0.039 |
| Dosulepin                                       | 31            | 1.72                | (1.19 to 2.47) | 0.004  | 1.10                           | (0.76 to 1.59) | 0.62  |
| Lofepramine                                     | 16            | 2.32                | (1.40 to 3.86) | 0.001  | 1.82                           | (1.09 to 3.04) | 0.022 |
| Trazodone                                       | 6             | 1.48                | (0.66 to 3.29) | 0.34   | 0.83                           | (0.37 to 1.83) | 0.64  |
| <i>SSRIs:</i>                                   |               |                     |                |        |                                |                |       |
| Citalopram                                      | 189           | 1.27                | (1.08 to 1.49) | 0.004  | 1.11                           | (0.95 to 1.30) | 0.20  |
| Escitalopram                                    | 28            | 1.40                | (0.95 to 2.06) | 0.089  | 1.16                           | (0.78 to 1.72) | 0.47  |
| Fluoxetine                                      | 154           | 1.25                | (1.05 to 1.48) | 0.011  | 1.08                           | (0.91 to 1.29) | 0.38  |
| Paroxetine                                      | 31            | 1.25                | (0.88 to 1.79) | 0.22   | 0.99                           | (0.68 to 1.42) | 0.94  |
| Sertraline                                      | 44            | 1.40                | (1.03 to 1.90) | 0.034  | 1.17                           | (0.85 to 1.61) | 0.33  |
| <i>Others:</i>                                  |               |                     |                |        |                                |                |       |
| Mirtazapine                                     | 35            | 1.90                | (1.36 to 2.64) | <0.001 | 1.25                           | (0.90 to 1.75) | 0.19  |
| Venlafaxine                                     | 39            | 1.46                | (1.05 to 2.01) | 0.022  | 1.17                           | (0.84 to 1.63) | 0.36  |
| All other antidepressants                       | 14            | 1.51                | (0.90 to 2.55) | 0.12   | 1.08                           | (0.65 to 1.81) | 0.77  |
| Combined antidepressants                        | 21            | 2.22                | (1.47 to 3.35) | <0.001 | 1.44                           | (0.94 to 2.20) | 0.092 |

\* Based on numbers in adjusted analysis

DDD= defined daily dose

<sup>1</sup> Adjusted for age, sex, year of diagnosis of depression, severity of depression, deprivation, smoking status, alcohol intake, ethnic group (white/not recorded or non-white), coronary heart disease, diabetes, hypertension, cancer, epilepsy/seizures, hypothyroidism, osteoarthritis, asthma/chronic obstructive airways disease, rheumatoid arthritis, osteoporosis, liver disease, renal disease, obsessive-compulsive disorder, statins, NSAIDs, aspirin, antihypertensive drugs, anticonvulsants, hypnotics/anxiolytics, oral contraceptives, hormone replacement therapy, antipsychotics, bisphosphonates, anticoagulants.

**Table L** Adjusted hazard ratios for arrhythmia by antidepressant class, and individual drug over 5 years follow-up adjusted for different subsets of confounding variables

|                             | Unadjusted   |                | Model A <sup>1</sup>  |                | Model B <sup>2</sup>  |                | Model C <sup>3</sup>  |                | Full model <sup>4</sup> |                |
|-----------------------------|--------------|----------------|-----------------------|----------------|-----------------------|----------------|-----------------------|----------------|-------------------------|----------------|
|                             | Hazard ratio | 95% CI         | Adjusted hazard ratio | 95% CI         | Adjusted hazard ratio | 95% CI         | Adjusted hazard ratio | 95% CI         | Adjusted hazard ratio   | 95% CI         |
| <b>Antidepressant class</b> |              |                |                       |                |                       |                |                       |                |                         |                |
| No current use              | 1.00         |                | 1.00                  |                | 1.00                  |                | 1.00                  |                | 1.00                    |                |
| TCA's                       | 1.59         | (1.29 to 1.96) | 1.20                  | (0.97 to 1.49) | 1.19                  | (0.96 to 1.48) | 1.11                  | (0.89 to 1.38) | 1.09                    | (0.88 to 1.35) |
| SSRIs                       | 1.02         | (0.89 to 1.18) | 0.92                  | (0.80 to 1.06) | 0.91                  | (0.79 to 1.05) | 0.85                  | (0.74 to 0.98) | 0.84                    | (0.73 to 0.97) |
| Other antidepressants       | 1.55         | (1.23 to 1.95) | 1.32                  | (1.04 to 1.67) | 1.31                  | (1.04 to 1.66) | 1.24                  | (0.98 to 1.57) | 1.21                    | (0.96 to 1.54) |
| Combined antidepressants    | 1.47         | (0.75 to 2.89) | 1.20                  | (0.61 to 2.36) | 1.20                  | (0.61 to 2.35) | 1.10                  | (0.57 to 2.15) | 1.07                    | (0.54 to 2.09) |
| <b>Antidepressant drug</b>  |              |                |                       |                |                       |                |                       |                |                         |                |
| No current use              | 1.00         |                | 1.00                  |                | 1.00                  |                | 1.00                  |                | 1.00                    |                |
| <i>TCA's:</i>               |              |                |                       |                |                       |                |                       |                |                         |                |
| Amitriptyline               | 1.75         | (1.32 to 2.33) | 1.32                  | (0.99 to 1.75) | 1.30                  | (0.98 to 1.73) | 1.19                  | (0.89 to 1.59) | 1.16                    | (0.87 to 1.54) |
| Dosulepin                   | 1.31         | (0.87 to 1.98) | 0.97                  | (0.64 to 1.47) | 0.96                  | (0.64 to 1.46) | 0.94                  | (0.62 to 1.42) | 0.93                    | (0.61 to 1.40) |
| Lofepamine                  | 2.10         | (1.28 to 3.46) | 1.92                  | (1.17 to 3.15) | 1.90                  | (1.15 to 3.12) | 1.71                  | (1.03 to 2.82) | 1.67                    | (1.01 to 2.76) |
| Trazodone                   | 1.33         | (0.55 to 3.21) | 0.80                  | (0.30 to 2.16) | 0.81                  | (0.30 to 2.18) | 0.73                  | (0.27 to 1.96) | 0.72                    | (0.27 to 1.94) |
| <i>SSRIs:</i>               |              |                |                       |                |                       |                |                       |                |                         |                |
| Citalopram                  | 1.07         | (0.90 to 1.28) | 0.93                  | (0.77 to 1.12) | 0.92                  | (0.76 to 1.10) | 0.86                  | (0.72 to 1.04) | 0.86                    | (0.71 to 1.03) |
| Escitalopram                | 1.33         | (0.91 to 1.93) | 1.11                  | (0.75 to 1.64) | 1.10                  | (0.75 to 1.63) | 1.07                  | (0.72 to 1.59) | 1.06                    | (0.71 to 1.57) |
| Fluoxetine                  | 0.86         | (0.69 to 1.08) | 0.82                  | (0.65 to 1.02) | 0.81                  | (0.65 to 1.01) | 0.75                  | (0.60 to 0.93) | 0.74                    | (0.59 to 0.92) |
| Paroxetine                  | 1.13         | (0.77 to 1.66) | 1.02                  | (0.69 to 1.50) | 1.02                  | (0.69 to 1.50) | 0.97                  | (0.66 to 1.43) | 0.97                    | (0.66 to 1.43) |
| Sertraline                  | 1.15         | (0.80 to 1.65) | 1.06                  | (0.73 to 1.53) | 1.05                  | (0.72 to 1.51) | 0.98                  | (0.68 to 1.42) | 0.97                    | (0.67 to 1.40) |
| <i>Others:</i>              |              |                |                       |                |                       |                |                       |                |                         |                |
| Mirtazapine                 | 1.73         | (1.19 to 2.52) | 1.34                  | (0.91 to 1.97) | 1.34                  | (0.91 to 1.97) | 1.25                  | (0.85 to 1.83) | 1.20                    | (0.81 to 1.77) |
| Venlafaxine                 | 1.45         | (1.04 to 2.03) | 1.34                  | (0.95 to 1.87) | 1.33                  | (0.95 to 1.86) | 1.28                  | (0.91 to 1.80) | 1.27                    | (0.91 to 1.79) |
| All other antidepressants   | 1.02         | (0.51 to 2.03) | 0.82                  | (0.41 to 1.63) | 0.81                  | (0.41 to 1.62) | 0.75                  | (0.38 to 1.51) | 0.73                    | (0.37 to 1.46) |
| Combined antidepressants    | 1.47         | (0.75 to 2.89) | 1.20                  | (0.61 to 2.36) | 1.20                  | (0.61 to 2.35) | 1.10                  | (0.56 to 2.14) | 1.06                    | (0.54 to 2.08) |

<sup>1</sup> Model A: adjusted only for age, sex, deprivation, ethnicity, year of diagnosis

<sup>2</sup> Model B: adjusted for age, sex, deprivation, ethnicity, year of diagnosis plus depression severity, smoking, alcohol

<sup>3</sup> Model C: adjusted for variables in model B plus coronary heart disease, diabetes, hypertension, stroke/TIA, rheumatoid arthritis, renal disease, statins, aspirin, antihypertensives, anticoagulants

<sup>4</sup> Full model: adjusted for confounders listed in footnote to Table 2

**Table M** Adjusted hazard ratios for myocardial infarction by antidepressant class, and individual drug over 5 years follow-up adjusted for different subsets of confounding variables.

|                             | Unadjusted   |                | Model A <sup>1</sup>  |                | Model B <sup>2</sup>  |                | Model C <sup>3</sup>  |                | Full model <sup>4</sup> |                |
|-----------------------------|--------------|----------------|-----------------------|----------------|-----------------------|----------------|-----------------------|----------------|-------------------------|----------------|
|                             | Hazard ratio | 95% CI         | Adjusted hazard ratio | 95% CI         | Adjusted hazard ratio | 95% CI         | Adjusted hazard ratio | 95% CI         | Adjusted hazard ratio   | 95% CI         |
| <b>Antidepressant class</b> |              |                |                       |                |                       |                |                       |                |                         |                |
| No current use              | 1.00         |                | 1.00                  |                | 1.00                  |                | 1.00                  |                | 1.00                    |                |
| TCAs                        | 1.83         | (1.44 to 2.33) | 1.33                  | (1.04 to 1.69) | 1.27                  | (1.00 to 1.61) | 1.23                  | (0.97 to 1.57) | 1.20                    | (0.94 to 1.52) |
| SSRIs                       | 1.02         | (0.86 to 1.22) | 0.91                  | (0.77 to 1.08) | 0.90                  | (0.76 to 1.07) | 0.85                  | (0.72 to 1.01) | 0.85                    | (0.71 to 1.00) |
| Other antidepressants       | 1.39         | (0.98 to 1.98) | 1.07                  | (0.75 to 1.53) | 1.01                  | (0.71 to 1.45) | 1.00                  | (0.70 to 1.43) | 1.00                    | (0.70 to 1.42) |
| Combined antidepressants    | 0.84         | (0.27 to 2.59) | 0.63                  | (0.20 to 1.92) | 0.59                  | (0.19 to 1.82) | 0.58                  | (0.19 to 1.78) | 0.57                    | (0.18 to 1.75) |
| <b>Antidepressant drug</b>  |              |                |                       |                |                       |                |                       |                |                         |                |
| No current use              | 1.00         |                | 1.00                  |                | 1.00                  |                | 1.00                  |                | 1.00                    |                |
| <i>TCAs:</i>                |              |                |                       |                |                       |                |                       |                |                         |                |
| Amitriptyline               | 1.84         | (1.28 to 2.62) | 1.31                  | (0.92 to 1.86) | 1.26                  | (0.88 to 1.79) | 1.21                  | (0.85 to 1.72) | 1.17                    | (0.82 to 1.66) |
| Dosulepin                   | 1.79         | (1.14 to 2.81) | 1.27                  | (0.81 to 1.99) | 1.21                  | (0.77 to 1.90) | 1.20                  | (0.76 to 1.88) | 1.17                    | (0.75 to 1.83) |
| Lofepamine                  | 2.73         | (1.54 to 4.84) | 2.31                  | (1.30 to 4.11) | 2.20                  | (1.24 to 3.91) | 2.05                  | (1.16 to 3.64) | 2.02                    | (1.14 to 3.59) |
| Trazodone                   | 1.01         | (0.25 to 4.06) | 0.64                  | (0.16 to 2.56) | 0.60                  | (0.15 to 2.40) | 0.58                  | (0.14 to 2.33) | 0.57                    | (0.14 to 2.30) |
| <i>SSRIs:</i>               |              |                |                       |                |                       |                |                       |                |                         |                |
| Citalopram                  | 1.05         | (0.83 to 1.33) | 0.93                  | (0.73 to 1.18) | 0.92                  | (0.73 to 1.18) | 0.88                  | (0.69 to 1.12) | 0.88                    | (0.69 to 1.12) |
| Escitalopram                | 0.89         | (0.48 to 1.67) | 0.83                  | (0.44 to 1.55) | 0.83                  | (0.44 to 1.54) | 0.79                  | (0.42 to 1.47) | 0.77                    | (0.41 to 1.44) |
| Fluoxetine                  | 0.89         | (0.67 to 1.18) | 0.80                  | (0.60 to 1.08) | 0.79                  | (0.59 to 1.06) | 0.73                  | (0.54 to 0.99) | 0.73                    | (0.54 to 0.98) |
| Paroxetine                  | 1.02         | (0.60 to 1.73) | 0.82                  | (0.47 to 1.41) | 0.81                  | (0.47 to 1.41) | 0.77                  | (0.44 to 1.33) | 0.76                    | (0.44 to 1.31) |
| Sertraline                  | 1.53         | (1.01 to 2.31) | 1.37                  | (0.90 to 2.09) | 1.34                  | (0.88 to 2.04) | 1.27                  | (0.84 to 1.94) | 1.27                    | (0.84 to 1.94) |
| <i>Others:</i>              |              |                |                       |                |                       |                |                       |                |                         |                |
| Mirtazapine                 | 2.21         | (1.37 to 3.55) | 1.43                  | (0.89 to 2.32) | 1.31                  | (0.81 to 2.12) | 1.32                  | (0.81 to 2.13) | 1.31                    | (0.81 to 2.12) |
| Venlafaxine                 | 1.06         | (0.63 to 1.80) | 0.93                  | (0.54 to 1.58) | 0.90                  | (0.53 to 1.54) | 0.89                  | (0.52 to 1.52) | 0.89                    | (0.52 to 1.51) |
| All other antidepressants   | 0.72         | (0.24 to 2.21) | 0.55                  | (0.18 to 1.68) | 0.54                  | (0.18 to 1.66) | 0.53                  | (0.17 to 1.61) | 0.52                    | (0.17 to 1.60) |
| Combined antidepressants    | 0.84         | (0.27 to 2.59) | 0.63                  | (0.20 to 1.93) | 0.59                  | (0.19 to 1.82) | 0.58                  | (0.19 to 1.78) | 0.57                    | (0.18 to 1.75) |

<sup>1</sup> Model A: adjusted only for age, sex, deprivation, ethnicity, year of diagnosis

<sup>2</sup> Model B: adjusted for age, sex, deprivation, ethnicity, year of diagnosis plus depression severity, smoking, alcohol

<sup>3</sup> Model C: adjusted for variables in model B plus coronary heart disease, diabetes, hypertension, stroke/TIA, rheumatoid arthritis, renal disease, statins, aspirin, antihypertensives, anticoagulants

<sup>4</sup> Full model: adjusted for confounders listed in footnote to Table 5



**Table N** Adjusted hazard ratios for stroke/TIA by antidepressant class, and individual drug over 5 years follow-up adjusted for different subsets of confounding variables.

|                             | Unadjusted   |                | Model A <sup>1</sup>  |                | Model B <sup>2</sup>  |                | Model C <sup>3</sup>  |                | Full model <sup>4</sup> |                |
|-----------------------------|--------------|----------------|-----------------------|----------------|-----------------------|----------------|-----------------------|----------------|-------------------------|----------------|
|                             | Hazard ratio | 95% CI         | Adjusted hazard ratio | 95% CI         | Adjusted hazard ratio | 95% CI         | Adjusted hazard ratio | 95% CI         | Adjusted hazard ratio   | 95% CI         |
| <b>Antidepressant class</b> |              |                |                       |                |                       |                |                       |                |                         |                |
| No current use              | 1.00         |                | 1.00                  |                | 1.00                  |                | 1.00                  |                | 1.00                    |                |
| TCAs                        | 1.98         | (1.56 to 2.52) | 1.40                  | (1.10 to 1.77) | 1.35                  | (1.06 to 1.72) | 1.31                  | (1.03 to 1.67) | 1.24                    | (0.98 to 1.58) |
| SSRIs                       | 1.30         | (1.12 to 1.51) | 1.18                  | (1.01 to 1.37) | 1.16                  | (1.00 to 1.36) | 1.11                  | (0.96 to 1.29) | 1.09                    | (0.93 to 1.27) |
| Other antidepressants       | 1.71         | (1.30 to 2.25) | 1.33                  | (1.01 to 1.77) | 1.29                  | (0.97 to 1.71) | 1.27                  | (0.96 to 1.68) | 1.20                    | (0.91 to 1.60) |
| Combined antidepressants    | 2.59         | (1.47 to 4.55) | 1.84                  | (1.02 to 3.31) | 1.77                  | (0.98 to 3.21) | 1.71                  | (0.95 to 3.08) | 1.54                    | (0.86 to 2.78) |
| <b>Antidepressant drug</b>  |              |                |                       |                |                       |                |                       |                |                         |                |
| No current use              | 1.00         |                | 1.00                  |                | 1.00                  |                | 1.00                  |                | 1.00                    |                |
| <i>TCAs:</i>                |              |                |                       |                |                       |                |                       |                |                         |                |
| Amitriptyline               | 2.27         | (1.69 to 3.06) | 1.56                  | (1.16 to 2.11) | 1.51                  | (1.12 to 2.04) | 1.44                  | (1.07 to 1.94) | 1.35                    | (1.00 to 1.82) |
| Dosulepin                   | 1.81         | (1.20 to 2.72) | 1.23                  | (0.81 to 1.85) | 1.19                  | (0.79 to 1.80) | 1.20                  | (0.79 to 1.80) | 1.16                    | (0.77 to 1.76) |
| Lofepamine                  | 2.27         | (1.24 to 4.15) | 1.94                  | (1.07 to 3.53) | 1.90                  | (1.04 to 3.44) | 1.85                  | (1.01 to 3.36) | 1.75                    | (0.96 to 3.19) |
| Trazodone                   | 0.77         | (0.19 to 3.06) | 0.52                  | (0.13 to 2.00) | 0.49                  | (0.13 to 1.89) | 0.46                  | (0.12 to 1.76) | 0.43                    | (0.11 to 1.66) |
| <i>SSRIs:</i>               |              |                |                       |                |                       |                |                       |                |                         |                |
| Citalopram                  | 1.24         | (1.02 to 1.52) | 1.14                  | (0.93 to 1.39) | 1.12                  | (0.92 to 1.37) | 1.08                  | (0.89 to 1.32) | 1.06                    | (0.87 to 1.30) |
| Escitalopram                | 1.15         | (0.70 to 1.88) | 1.04                  | (0.64 to 1.71) | 1.03                  | (0.63 to 1.68) | 1.00                  | (0.61 to 1.64) | 0.97                    | (0.59 to 1.59) |
| Fluoxetine                  | 1.36         | (1.11 to 1.65) | 1.26                  | (1.03 to 1.54) | 1.24                  | (1.01 to 1.52) | 1.16                  | (0.95 to 1.42) | 1.13                    | (0.93 to 1.39) |
| Paroxetine                  | 1.21         | (0.78 to 1.88) | 1.00                  | (0.64 to 1.57) | 0.99                  | (0.63 to 1.56) | 0.97                  | (0.62 to 1.53) | 0.95                    | (0.61 to 1.50) |
| Sertraline                  | 1.55         | (1.06 to 2.25) | 1.37                  | (0.94 to 1.99) | 1.35                  | (0.93 to 1.96) | 1.29                  | (0.89 to 1.88) | 1.26                    | (0.86 to 1.83) |
| <i>Others:</i>              |              |                |                       |                |                       |                |                       |                |                         |                |
| Mirtazapine                 | 2.23         | (1.51 to 3.28) | 1.56                  | (1.05 to 2.33) | 1.48                  | (0.99 to 2.20) | 1.44                  | (0.96 to 2.15) | 1.35                    | (0.90 to 2.02) |
| Venlafaxine                 | 1.33         | (0.88 to 2.03) | 1.11                  | (0.72 to 1.73) | 1.09                  | (0.70 to 1.69) | 1.09                  | (0.71 to 1.70) | 1.05                    | (0.67 to 1.63) |
| All other antidepressants   | 1.47         | (0.73 to 2.96) | 1.13                  | (0.56 to 2.26) | 1.11                  | (0.55 to 2.21) | 1.09                  | (0.54 to 2.19) | 1.00                    | (0.50 to 2.02) |
| Combined antidepressants    | 2.59         | (1.47 to 4.55) | 1.84                  | (1.02 to 3.31) | 1.78                  | (0.98 to 3.21) | 1.71                  | (0.95 to 3.09) | 1.55                    | (0.86 to 2.78) |

<sup>1</sup> Model A: adjusted only for age, sex, deprivation, ethnicity, year of diagnosis

<sup>2</sup> Model B: adjusted for age, sex, deprivation, ethnicity, year of diagnosis plus depression severity, smoking, alcohol

<sup>3</sup> Model C: adjusted for variables in model B plus coronary heart disease, diabetes, hypertension, rheumatoid arthritis, renal disease, statins, aspirin, antihypertensives, anticoagulants

<sup>4</sup> Full model: adjusted for confounders listed in footnote to Table 6
